# Supplementary material for: Association of glucagon-like peptide-1 receptor agonists with cardiac arrhythmias in patients with type 2 diabetes or obesity: a systematic review and meta-analysis of randomized controlled trials
Source: PubMed Central journal article supplement (PMC9791739; doi:10.1186/s13098-022-00970-2), 2022-12-26
Supplement: 13098_2022_970_MOESM1_ESM.pdf [file 13098_2022_970_MOESM1_ESM.pdf]

## **Supplementary Context**

An additional file of the manuscript entitled “Association of glucagon-like peptide-1 receptor agonists with cardiac arrhythmias in patients with type 2 diabetes or obesity: a systematic review and meta-analysis of randomized controlled trials”

**Method S1.** Data sources and search strategies

**Table S1.** Eligible criteria for included studies

**Table S2.** Baseline characteristics of included studies and participants

**Figure S1.** Methodological quality assessment of included studies

**Figure S2.** Risks of cardiac arrhythmias in patients with GLP-1 RAs treatments compared with control groups

**Figure S3.** Subgroup analyses on the association of GLP-1 RAs use with incident atrial fibrillation

**Figure S4.** Subgroup analyses on the association of GLP-1 RAs use with the incidence of atrial flutter

**Figure S5.** Subgroup analyses on the association of GLP-1 RAs use with the incidence of ventricular arrhythmias

**Figure S6.** Subgroup analyses on the association of GLP-1 RAs use with the incidence of sudden cardiac death

**Figure S7.** Sensitivity analyses by omitting each trial one by one of all included studies

**Figure S8.** Funnel plots for each outcome

**References S1**

## Method S1. Data Sources and Search strategies

Example of a search strategy run in Pubmed

#1

```
TS= (((((((((((("glucagon like peptide 1 receptor agonist"[Title/Abstract]) OR ("glp 1 agonist"[Title/Abstract])) OR ("glp 1 receptor agonist"[Title/Abstract])) OR ("glucagon like peptide 1 agonist"[Title/Abstract])) OR ("long acting glp 1 agonist"[Title/Abstract])) OR ("long acting glp 1 receptor agonist"[Title/Abstract])) OR ("long acting glucagon like peptide 1 receptor agonist"[Title/Abstract])) OR (dulaglutide[Title/Abstract])) OR (liraglutide[Title/Abstract])) OR (exenatide[Title/Abstract])) OR (albiglutide[Title/Abstract])) OR (semaglutide[Title/Abstract])) OR (lixisenatide[Title/Abstract])
```

#2

```
TS= ((((((("random allocation") OR ("randomized controlled trial")) OR ("controlled clinical trial")) OR ("clinical trial")) OR (randomi?ed)) OR (randomly)) OR (randomization)
```

#3

```
TS=("1948/01/01"[Date - Publication] : "2022/05/25"[Date - Publication])
```

#4

```
#1 AND #2 AND #3
```

**Table S1. Eligible criteria for included studies**

| <b>Inclusion criteria</b>                                                                            | <b>Exclusion criteria</b>                                                                                                               |
|------------------------------------------------------------------------------------------------------|-----------------------------------------------------------------------------------------------------------------------------------------|
| (1) RCTs with at least one arm including GLP-1 RAs medications.                                      | (1) Review, comment, guideline, conference abstract, basic studies, case report, non-RCT clinical studies, or other irrelevant studies. |
| (2) Presence of a control group (either placebo-controlled or active-controlled).                    | (2) Post hoc analysis or exploratory analysis of existing RCTs.                                                                         |
| (3) Adult patients older than 18 years with diagnosed T2DM/prediabetes, obesity/overweight, or both. | (3) Participants with GLP-1 RAs treatments before primary trials.                                                                       |
| (4) The duration of treatments was at least 24 weeks.                                                | (4) Participants with T1DM or other diseases (e.g., AD, PD, or NAFLD) besides T2DM and obesity.                                         |
|                                                                                                      | (5) Compound preparations of GLP-1 RAs and other drugs(e.g., IDegLira).                                                                 |
|                                                                                                      | (6) Comparisons between different GLP-1 RAs individuals.                                                                                |
|                                                                                                      | (7) Data is not available or fails to report the events of AF/AFL, VAs, or SCD.                                                         |
|                                                                                                      | (8) Excluding trials with zero events in both the GLP-1 RAs group and control group.                                                    |

Abbreviations: GLP-1 RAs, glucagon-like peptide 1 receptor agonists; T2DM, Type 2 diabetes mellitus; RCT, randomized controlled trial; AD, Alzheimer's disease; PD, Parkinson's disease; NAFLD, non-alcoholic fatty liver disease; AF, atrial fibrillation; AFL, atrial flutter; VAs, ventricular arrhythmias; SCD, sudden cardiac death.

**Table S2. Baseline characteristics of included studies and participants**

| <b>Trials, year</b>       | <b>Registration number</b> | <b>Inclusion criteria</b>           | <b>Population size</b> | <b>Males, n(%)</b> | <b>Age (years)</b> | <b>BMI (kg/m<sup>2</sup>)</b> | <b>HbA1c</b> | <b>Follow-up duration</b> | <b>Interventions</b>             | <b>Controls</b>                   | <b>Outcomes of interest</b> |
|---------------------------|----------------------------|-------------------------------------|------------------------|--------------------|--------------------|-------------------------------|--------------|---------------------------|----------------------------------|-----------------------------------|-----------------------------|
| HARMONY 1, 2014[1]        | NCT00849056                | T2DM with pioglitazone              | 301                    | 180(59.8%)         | 55.0               | 34.1                          | 8.1%         | 52 weeks                  | Albiglutide 30mg, weekly         | Placebo                           | AF                          |
| HARMONY 3, 2014[2]        | NCT00838903                | T2DM with metformin                 | 1012                   | 482(47.6%)         | 54.5               | 32.7                          | 8.1%         | 104 weeks                 | Albiglutide 30mg, weekly         | Sitagliptin, glimepiride, placebo | SCD                         |
| HARMONY 4, 2014[3]        | NCT00838916                | T2DM with metformin                 | 745                    | 418(56.1%)         | 55.5               | 33.1                          | 8.3%         | 52 weeks                  | Albiglutide 30mg, weekly         | Insulin glargine                  | AF/AFL/VAs                  |
| HARMONY 8, 2014[4]        | NCT01098539                | T2DM with renal impairment          | 495                    | 266(53.7%)         | 63.3               | 30.4                          | 8.2%         | 52 weeks                  | Albiglutide 30mg, weekly         | Sitagliptin                       | AF/AFL/VAs                  |
| Rosenstock et al, 2014[5] | NCT00976391                | T2DM with insulin                   | 566                    | 268(47.3%)         | 55.6               | NA                            | 8.5%         | 26 weeks                  | Albiglutide 30mg, weekly         | Insulin lispro                    | AF/VAs                      |
| HARMONY 5, 2015[6]        | NCT00839527                | T2DM with OAD                       | 663                    | 353(53.2%)         | 55.2               | 32.2                          | 8.2%         | 52 weeks                  | Albiglutide 30mg, weekly         | Pioglitazone, placebo             | AF                          |
| HARMONY 2, 2016[7]        | NCT00849017                | T2DM with diet and exercise control | 301                    | 166(55.1%)         | 52.9               | 33.9                          | 8.2%         | 52 weeks                  | Albiglutide 30mg/50mg, weekly    | Placebo                           | AF                          |
| Harmony Outcomes, 2018[8] | NCT02465515                | T2DM with CVD                       | 9432                   | 6569(69.4%)        | 64.1               | 32.3                          | 8.7%         | 78 weeks                  | Albiglutide 30/50mg, weekly      | Placebo                           | AF/AFL/VAs/SCD              |
| Rosenstock et al, 2020[9] | NCT02229227                | T2DM with insulin                   | 813                    | 372(45.7%)         | 58.1               | 32.1                          | 7.7%         | 26 weeks                  | Albiglutide 30mg, weekly         | Insulin lispro                    | AF/AFL                      |
| Ferdinand et al, 2014[10] | NCT01149421                | T2DM with OAD                       | 755                    | 392(51.9%)         | 56.5               | 33.0                          | 7.9%         | 26 weeks                  | Dulaglutide 0.75mg/1.5mg, weekly | Placebo                           | VAs                         |
| AWARD-3, 2014[11]         | NCT01126580                | T2DM with OAD                       | 807                    | 353(43.7%)         | 55.6               | 33.3                          | 7.6%         | 52 weeks                  | Dulaglutide 0.75mg/1.5mg, weekly | metformin                         | AF                          |
| AWARD-5, 2014[12]         | NCT00734474                | T2DM with metformin                 | 1098                   | 559(46.5%)         | 54.0               | 31.3                          | 8.1%         | 52 weeks                  | Dulaglutide 0.75mg/1.5mg, weekly | Sitagliptin, placebo              | AF/SCD                      |
| AWARD-2, 2015[13]         | NCT01075282                | T2DM with OAD                       | 807                    | 414(51.3%)         | 56.6               | 31.6                          | 8.1%         | 78 weeks                  | Dulaglutide 0.75mg/1.5mg, weekly | Insulin glargine                  | VAs                         |
| AWARD-4, 2015[14]         | NCT01191268                | T2DM with insulin                   | 884                    | 473(53.5%)         | 59.4               | 32.5                          | 8.5%         | 52 weeks                  | Dulaglutide 0.75mg/1.5mg, weekly | Insulin glargine                  | AF/AFL/VAs                  |

| <b>Trials, year</b>     | <b>Registration number</b> | <b>Inclusion criteria</b>          | <b>Population size</b> | <b>Males, n(%)</b> | <b>Age (years)</b> | <b>BMI (kg/m<sup>2</sup>)</b> | <b>HbA1c</b> | <b>Follow-up duration</b> | <b>Interventions</b>                 | <b>Controls</b>      | <b>Outcomes of interest</b> |
|-------------------------|----------------------------|------------------------------------|------------------------|--------------------|--------------------|-------------------------------|--------------|---------------------------|--------------------------------------|----------------------|-----------------------------|
| AWARD-9, 2017[15]       | NCT02152371                | T2DM with insulin glargine         | 300                    | 173(57.7%)         | 60.4               | 32.8                          | 8.4%         | 28 weeks                  | Dulaglutide 1.5mg, weekly            | Placebo              | AF                          |
| AWARD-7, 2018[16]       | NCT01621178                | T2DM with CKD                      | 576                    | 301(52.2%)         | 64.6               | 32.5                          | 8.6%         | 52 weeks                  | Dulaglutide 0.75mg/1.5mg, weekly     | Insulin glargine     | AF/SCD                      |
| AWARD-10, 2018[17]      | NCT02597049                | T2DM with SGLT2i                   | 423                    | 212(50.1%)         | 57.3               | 32.9                          | 8.0%         | 24 weeks                  | Dulaglutide 0.75mg/1.5mg, weekly     | Placebo              | AF                          |
| Chen et al, 2018[18]    | NCT01644500                | T2DM with OAD                      | 735                    | 391(54.3%)         | 52.8               | 25.9                          | 8.0%         | 26 weeks                  | Dulaglutide 0.75mg/1.5mg, weekly     | Glimepiride          | VAs                         |
| REWIND, 2019[19]        | NCT01394952                | T2DM with previous CVD or CVD risk | 9892                   | 5312(53.7%)        | 66.2               | 32.3                          | 7.3%         | 282 weeks                 | Dulaglutide 1.5mg, weekly            | Placebo              | AF/AFL/VAs/SCD              |
| Heine et al, 2005[20]   | NCT00082381                | T2DM with OAD                      | 549                    | 306(55.7%)         | 58.9               | 31.4                          | 8.2%         | 26 weeks                  | Exenatide 10µg, twice daily          | Insulin glargine     | AF                          |
| Nauck et al, 2007[21]   | NCT00082407                | T2DM with OAD                      | 501                    | 244(48.7%)         | 58.7               | 30.6                          | 8.6%         | 52 weeks                  | Exenatide 10µg, twice daily          | Biphasic Insulin     | AF/AFL                      |
| NCT00701935, 2008[22]   | NCT00701935                | T2DM with metformin                | 80                     | 42(52.5%)          | 58.1               | NA                            | NA           | 26 weeks                  | Exenatide 10µg, twice daily          | Placebo              | AF                          |
| EUREXA, 2012[23]        | NCT00359762                | T2DM with metformin                | 1019                   | 524(53.6%)         | 56.4               | 32.6                          | 7.5%         | 208 weeks                 | Exenatide 10µg, twice daily          | Glimepiride          | AF/AFL                      |
| DURATION-3, 2010[24]    | NCT00641056                | T2DM with OAD                      | 456                    | 243(53.3%)         | 57.9               | 32.0                          | 8.3%         | 26 weeks                  | Exenatide 2mg, weekly                | Insulin glargine     | SCD                         |
| Inagaki et al, 2012[25] | NCT00935532                | T2DM with OAD                      | 427                    | 290(67.9%)         | 56.8               | 26.2                          | 8.5%         | 26 weeks                  | Exenatide 2mg, weekly                | Insulin glargine     | AF                          |
| Davies et al, 2013[26]  | NCT01003184                | T2DM with metformin                | 216                    | 143(66.2%)         | 58.5               | 33.7                          | 8.4%         | 26 weeks                  | Exenatide 2mg, weekly                | Insulin detemir      | VAs                         |
| LEAD-2, 2009[27]        | NCT00318461                | T2DM with metformin                | 1087                   | 633(58.2%)         | 56.7               | 31.0                          | 8.4%         | 26 weeks                  | Liraglutide 0.6mg/1.2mg/1.8mg, daily | Glimepiride, placebo | AF/AFL/VAs/SCD              |
| LEAD-3 Mono, 2009[28]   | NTC00294723                | T2DM with OAD                      | 746                    | 371(49.7%)         | 53.0               | 33.1                          | 8.3%         | 104 weeks                 | Liraglutide 1.2mg/1.8mg, daily       | Glimepiride          | AF                          |
| Pratley et al, 2010[29] | NCT00700817                | T2DM with metformin                | 658                    | 352(52.9%)         | 55.3               | 32.8                          | 8.4%         | 26 weeks                  | Liraglutide 1.2mg/1.8mg, daily       | Sitagliptin          | SCD                         |

| Trials, year                            | Registration number    | Inclusion criteria                                                                  | Population size | Males, n(%) | Age (years) | BMI (kg/m <sup>2</sup> ) | HbA1c | Follow-up duration | Interventions                  | Controls          | Outcomes of interest |
|-----------------------------------------|------------------------|-------------------------------------------------------------------------------------|-----------------|-------------|-------------|--------------------------|-------|--------------------|--------------------------------|-------------------|----------------------|
| Charbonnel et al, 2013[30]              | NCT01296412            | T2DM with metformin                                                                 | 650             | 358(54.8%)  | 57.3        | 32.7                     | 8.2%  | 26 weeks           | Liraglutide 0.6mg/1.2mg, daily | Sitagliptin       | AF                   |
| MDI-Liraglutide, 2015[31]               | EudraCT 2012-001941-42 | T2DM with insulin, BMI 27.5-45 kg/m <sup>2</sup>                                    | 124             | 80(64.5%)   | 63.7        | 33.7                     | 9.0%  | 24 weeks           | Liraglutide 1.8mg, daily       | Placebo           | AF                   |
| SCALE Obesity and Prediabetes, 2015[32] | NCT01272219            | Obesity with BMI≥30kg/m <sup>2</sup> , or BMI≥27kg/m <sup>2</sup> with dyslipidemia | 3723            | 803(21.5%)  | 45.1        | 38.3                     | 5.6%  | 56 weeks           | Liraglutide 3mg, daily         | Placebo           | AF/AFL/VAs/SCD       |
| Vanderheiden et al, 2016[33]            | NCT01505673            | T2DM with insulin                                                                   | 71              | 26(36.6%)   | 54.2        | 41.2                     | NA    | 26 weeks           | Liraglutide 1.8mg, daily       | Placebo           | AF                   |
| LEADER, 2016[34]                        | NCT01179048            | T2DM with high CVD risk                                                             | 9340            | 6003(64.3%) | 64.3        | 32.5                     | 8.7%  | 198 weeks          | Liraglutide 1.8mg, daily       | placebo           | AF/AFL/VAs/SCD       |
| Zang et al, 2016[35]                    | NCT02008682            | T2DM with metformin                                                                 | 367             | 219(59.7%)  | 51.5        | 27.2                     | 8.1%  | 26 weeks           | Liraglutide 1.8mg, daily       | Sitagliptin       | AF                   |
| SCALE Insulin, 2020[36]                 | NCT02963922            | Overweight or obesity; or T2DM with insulin                                         | 392             | 189(47.7%)  | 56.8        | 35.9                     | 8.0%  | 56 weeks           | Liraglutide 3mg, daily         | Placebo           | AF/AFL               |
| GETGOAL-M, 2013[37]                     | NCT00712673            | T2DM with metformin                                                                 | 680             | 293(43.1%)  | 54.7        | 33.0                     | 8.1%  | 24 weeks           | Lixisenatide 20 ug, daily      | Placebo           | AF/VAs               |
| GETGOAL-L, 2013[38]                     | NCT00715624            | T2DM with insulin or OAD                                                            | 495             | 228(46.1%)  | 57.2        | 32.1                     | 8.4%  | 24 weeks           | Lixisenatide 20 ug, daily      | Placebo           | AF/AFL               |
| GETGOAL-F1, 2014[39]                    | NCT00763451            | T2DM with metformin                                                                 | 482             | 215(44.6%)  | 56.1        | 32.5                     | 8.0%  | 24 weeks           | Lixisenatide 20 ug, daily      | Placebo           | AF                   |
| ELIXA, 2015[40]                         | NCT01147250            | T2DM with a recent acute coronary event                                             | 6063            | 4207(69.3%) | 60.3        | 30.2                     | 7.7%  | 107 weeks          | Lixisenatide 20 ug, daily      | Placebo           | AF/AFL/VAs/SCD       |
| GetGoal-Duo-2, 2016[41]                 | NCT01768559            | T2DM with overweight                                                                | 893             | 405(45.3%)  | 59.8        | 32.2                     | 7.8%  | 26 weeks           | Lixisenatide 20 ug, daily      | Insulin Glulisine | AF                   |

| <b>Trials, year</b>     | <b>Registration number</b> | <b>Inclusion criteria</b>           | <b>Population size</b> | <b>Males, n(%)</b> | <b>Age (years)</b> | <b>BMI (kg/m<sup>2</sup>)</b> | <b>HbA1c</b> | <b>Follow-up duration</b> | <b>Interventions</b>                | <b>Controls</b>      | <b>Outcomes of interest</b> |
|-------------------------|----------------------------|-------------------------------------|------------------------|--------------------|--------------------|-------------------------------|--------------|---------------------------|-------------------------------------|----------------------|-----------------------------|
| PIONEER 2, 2019[42]     | NCT02863328                | T2DM with metformin                 | 819                    | 415(50.5%)         | 58.0               | 32.8                          | 8.1%         | 52 weeks                  | Oral semaglutide 14mg, daily        | Empagliflozin        | AF/VAs                      |
| PIONEER 3, 2019[43]     | NCT02607865                | T2DM with metformin                 | 1861                   | 984(52.8%)         | 58.0               | 32.5                          | 8.3%         | 78 weeks                  | Oral semaglutide 3/7/14mg, daily    | Sitagliptin          | AF/AFL/SCD                  |
| PIONEER 5, 2019[44]     | NCT02827708                | T2DM with moderate renal impairment | 324                    | 156(48.1%)         | 70.0               | 32.4                          | 8.0%         | 26 weeks                  | Oral semaglutide 14mg, daily        | Placebo              | AF                          |
| PIONEER 6, 2019[45]     | NCT02692716                | T2DM with high CVD risk             | 3182                   | 2176(68.4%)        | 66.0               | 32.3                          | 8.2%         | 68 weeks                  | Oral semaglutide 14mg, daily        | Placebo              | AF/AFL/VAs/SCD              |
| PIONEER 8, 2019[46]     | NCT03021187                | T2DM with insulin                   | 730                    | 395(54%)           | 61.0               | 31.0                          | 8.2%         | 52 weeks                  | Oral semaglutide 3/7/14mg, daily    | Placebo              | AFL/VAs                     |
| SUSTAIN 6, 2016[47]     | NCT01720446                | T2DM with a standard care regimen   | 3297                   | 2002(60.7%)        | 64.6               | 32.8                          | 8.7%         | 104 weeks                 | Sc semaglutide 0.5mg/1mg, weekly    | Placebo              | AF/AFL/VAs/SCD              |
| SUSTAIN 2, 2017[48]     | NCT01930188                | T2DM with OAD                       | 1225                   | 620(50.6%)         | 55.1               | 32.5                          | 8.1%         | 56 weeks                  | Sc semaglutide 0.5mg/1mg, weekly    | Sitagliptin, placebo | AF                          |
| SUSTAIN 4, 2017[49]     | NCT02128932                | T2DM with naïve insulin             | 1082                   | 574(53%)           | 56.5               | 33.0                          | 8.2%         | 30 weeks                  | Sc semaglutide 0.5mg/1mg, weekly    | Insulin glargine     | AF                          |
| Kaku et al, 2018[50]    | NCT02207374                | T2DM with OAD                       | 600                    | 429(71.5%)         | 58.5               | 26.4                          | 8.1%         | 56 weeks                  | Sc semaglutide 0.5mg/1mg, weekly    | Placebo              | AF                          |
| SUSTAIN China, 2021[51] | NCT03061214                | T2DM with metformin                 | 867                    | 499(57.5%)         | 53.1               | 28.0                          | 8.1%         | 30 weeks                  | Sc semaglutide 0.5mg/1mg, weekly    | Sitagliptin          | AF/AFL                      |
| STEP 1, 2021[52]        | NCT03548935                | Overweight or obese, without T2DM   | 1961                   | 508(24.9%)         | 46.0               | 37.8                          | 5.7%         | 68 weeks                  | Sc semaglutide 2.4 mg, weekly       | placebo              | AF                          |
| STEP 2, 2021[53]        | NCT03552757                | Overweight or obesity               | 1207                   | 594(49.1%)         | 55.0               | 35.7                          | 8.1%         | 68 weeks                  | Sc semaglutide 1mg/ 2.4mg, weekly   | placebo              | AF                          |
| STEP 4, 2021[54]        | NCT03548987                | Overweight or obesity               | 803                    | 169(21%)           | 46.0               | 34.1                          | 5.4%         | 68 weeks                  | Sc semaglutide 2.4 mg, weekly       | placebo              | AF                          |
| STEP 6, 2022[55]        | NCT03811574                | Obesity, with or without T2DM       | 400                    | 253(63.1%)         | 51.0               | 31.9                          | 6.4%         | 68 weeks                  | Sc semaglutide 1.7mg/2.4 mg, weekly | placebo              | AF                          |

| <b>Trials, year</b>     | <b>Registration number</b> | <b>Inclusion criteria</b>                      | <b>Population size</b> | <b>Males, n(%)</b> | <b>Age (years)</b> | <b>BMI (kg/m<sup>2</sup>)</b> | <b>HbA1c</b> | <b>Follow-up duration</b> | <b>Interventions</b>       | <b>Controls</b> | <b>Outcomes of interest</b> |
|-------------------------|----------------------------|------------------------------------------------|------------------------|--------------------|--------------------|-------------------------------|--------------|---------------------------|----------------------------|-----------------|-----------------------------|
| SUSTAIN 11,<br>2022[56] | NCT03689374                | T2DM with insulin<br>glargine and<br>metformin | 1728                   | 894(51.1%)         | 61.2               | 31.5                          | 8.6%         | 52 weeks                  | Sc semaglutide 1mg, weekly | Insulin Aspart  | AF/AFL/SCD                  |

Notes: The registration number represents the unique identifier of ClinicalTrials.gov or EudraCT. Abbreviations: GLP-1 RAs, glucagon-like peptide 1 receptor agonists; T2DM, Type 2 diabetes mellitus; OAD, oral anti-diabetic drugs; CVD, cardiovascular disease; CKD, chronic kidney disease; SGLT-2i, sodium-glucose cotransporter-2 inhibitors; BMI, body mass index; Sc, subcutaneous injection; NA, not available; AF, atrial fibrillation; AFL, atrial flutter; VAs, ventricular arrhythmias; SCD, sudden cardiac death.



### Figure S1. Methodological quality assessment of included studies

Notes: Domain 1: Risk of bias arising from randomization process Domain 2: Risk of bias due to deviations from intended interventions Domain 3: Risk of bias due to missing outcome data. Domain 4: Risk of bias in outcome measurements. Domain 5: Risk of bias in the selection of reported results.

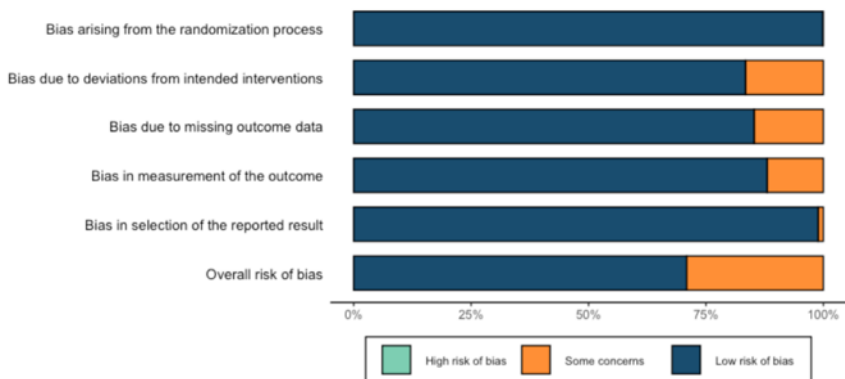

Figure S1.1. Summary of risk of bias of all included studies

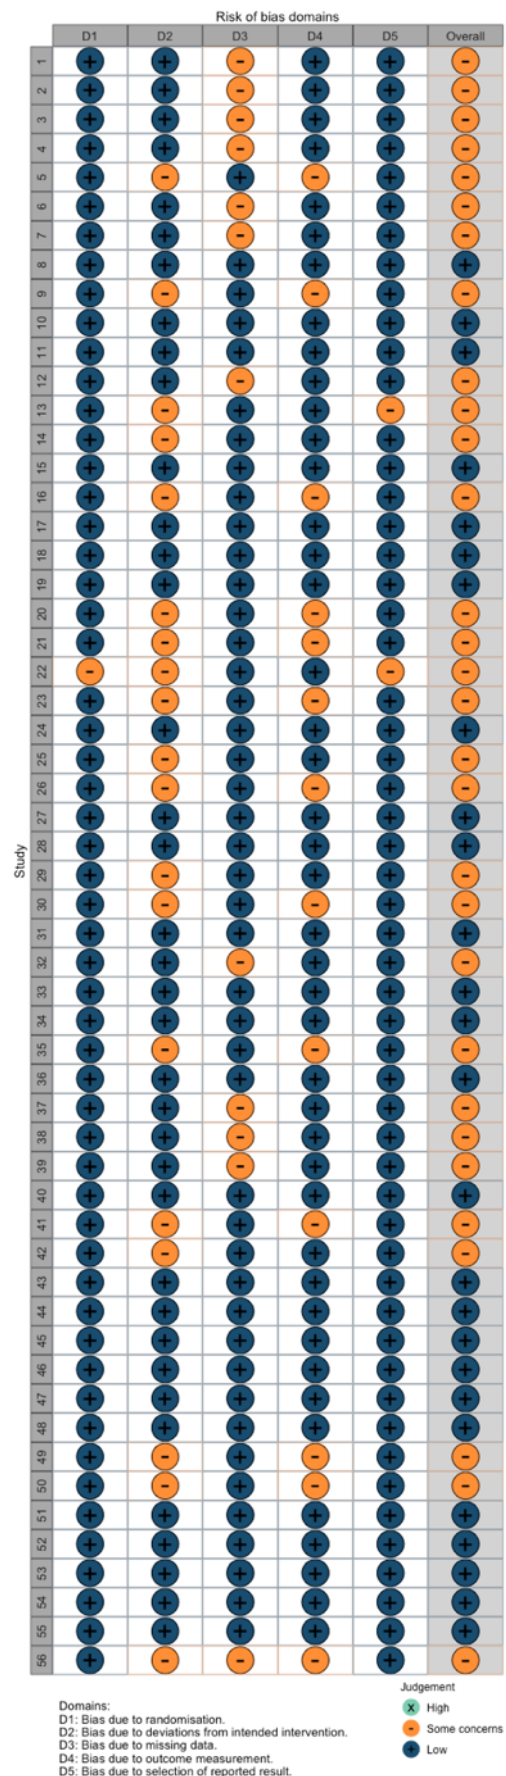

Figure S1.2. Risk of bias for each study

## Figure S2. Risks of cardiac arrhythmias in patients with GLP-1 RAs treatments compared with control groups

Notes: Experimental, GLP-1-RAs treatments; Control, placebo or active control. Abbreviations: GLP-1 RAs, glucagon-like peptide 1 receptor agonists; RR, relative risk; CI, confidence interval.

Figure S2.1. The risk of atrial fibrillation in patients with GLP-1RAs

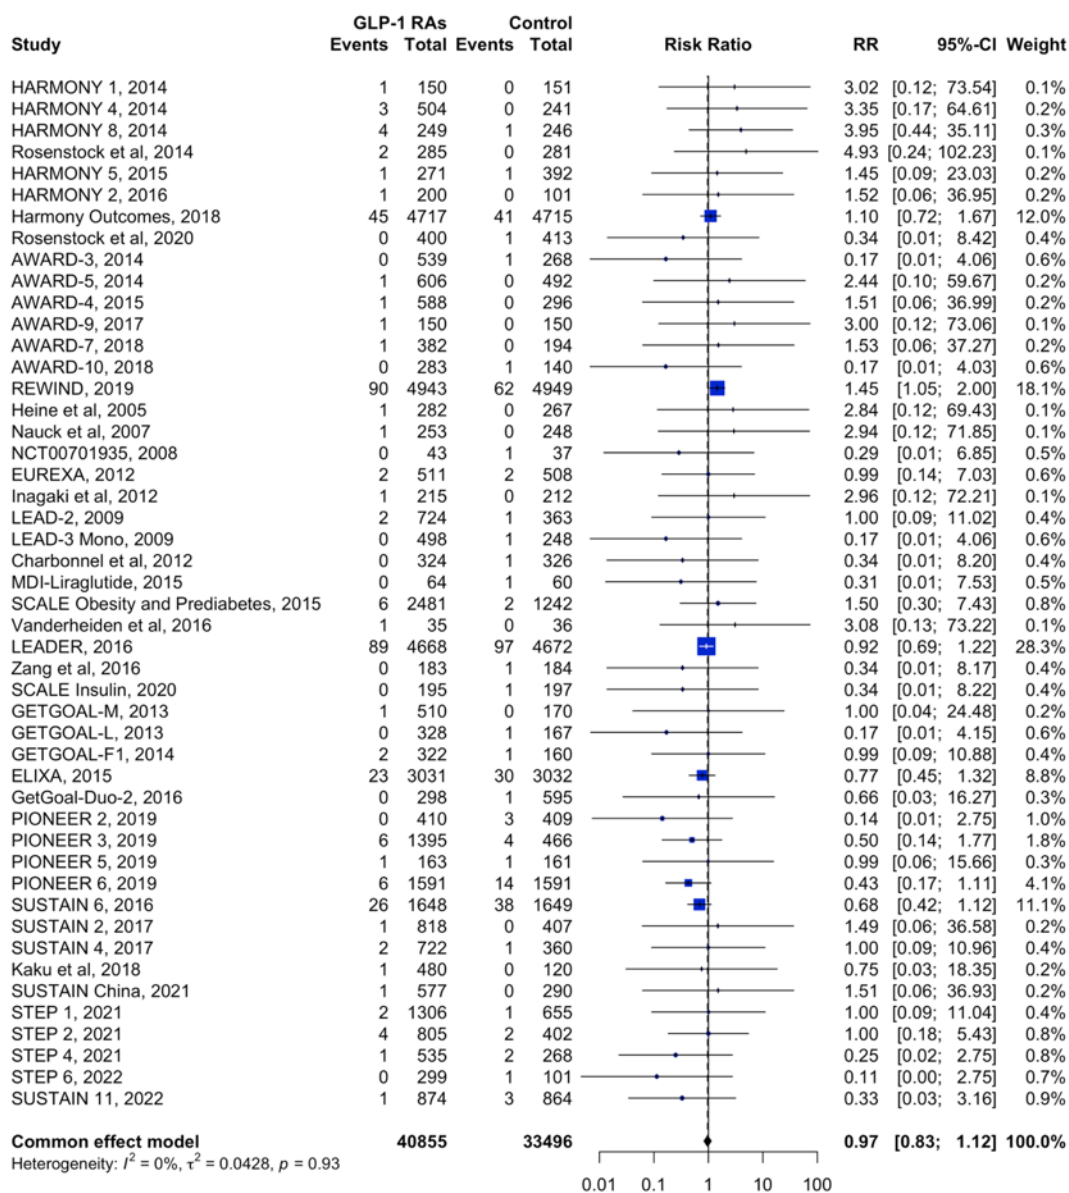

**Figure S2.2.** The risk of atrial flutter in patients with GLP-1RAs

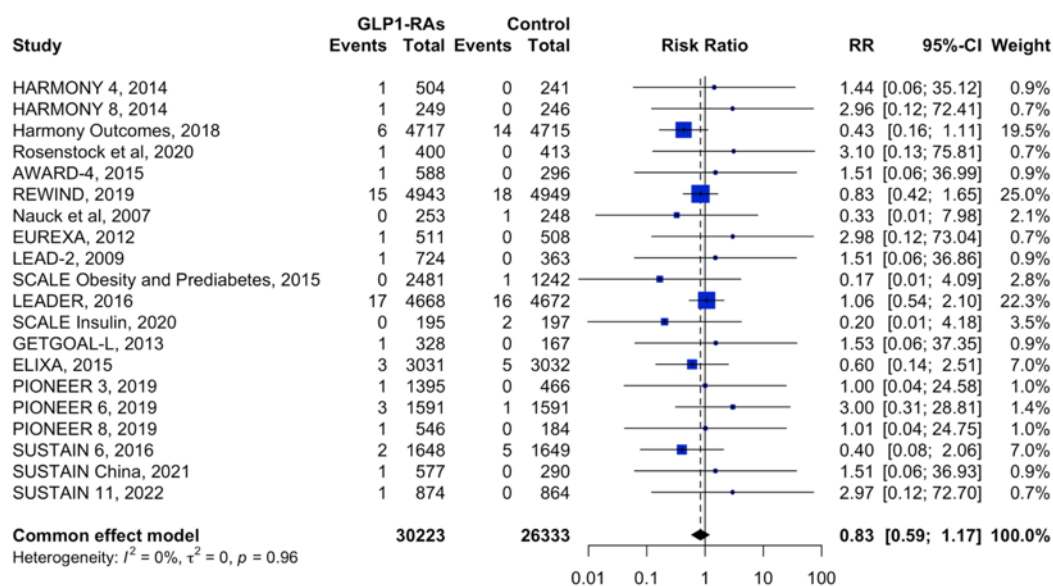

**Figure S2.3.** The risk of ventricular arrhythmias in patients with GLP-1RAs

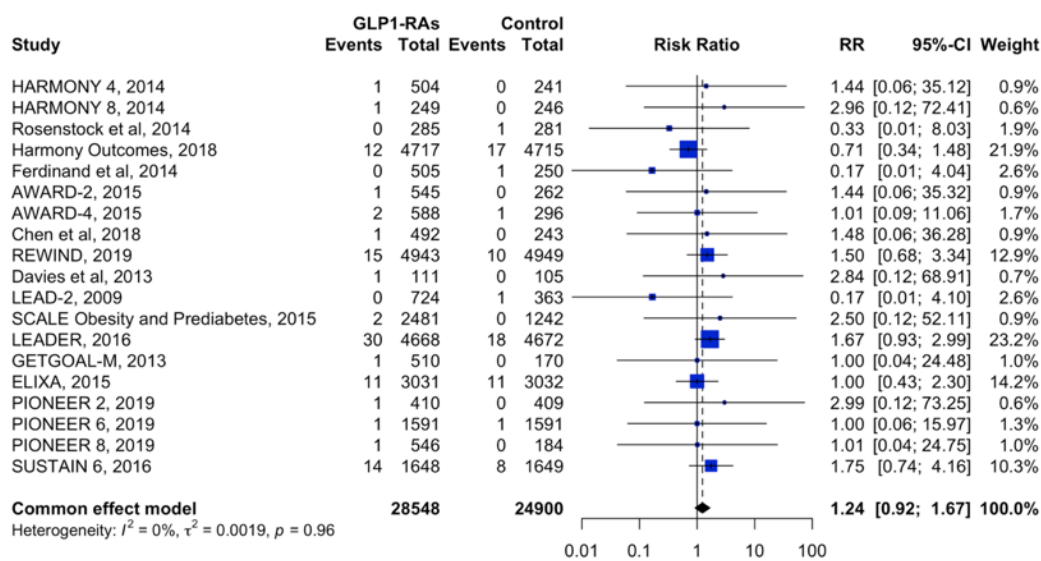

**Figure S2.4.** The risk of sudden cardiac death in patients with GLP-1RAs

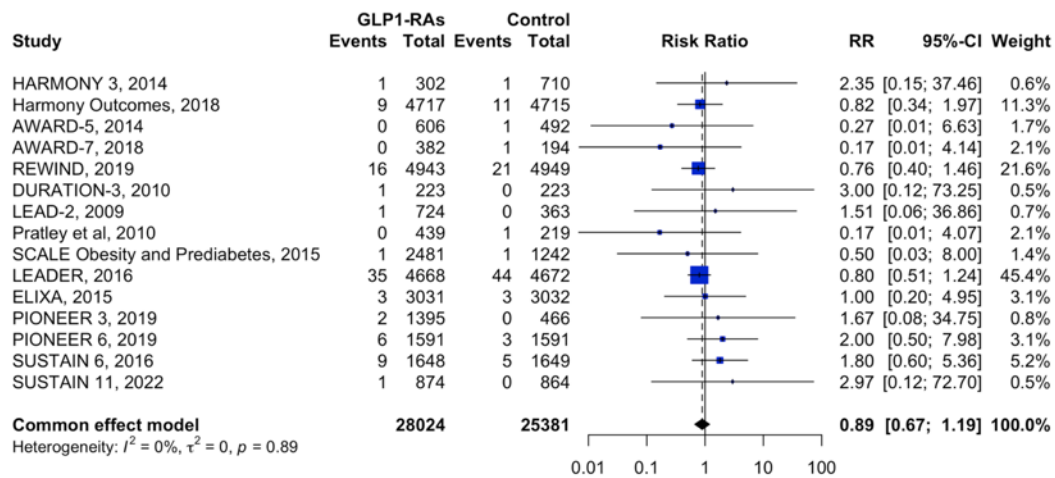

**Figure S3. Subgroup analyses on the association of GLP-1 RAs use with incident atrial fibrillation**

Notes: Experimental, GLP-1RAs treatments; Control, placebo or active control. Study designs: CVOT or non-CVOT. Abbreviations: RR, relative risks; CI, confidential intervals; GLP-1RAs, glucagon-like peptide 1 receptor agonists; BMI, body mass index; CVOT, cardiovascular outcome trial.

**Figure S3.1.** Effects of different GLP-1 RAs individuals on the association between GLP-1 RAs and the risk of atrial fibrillation

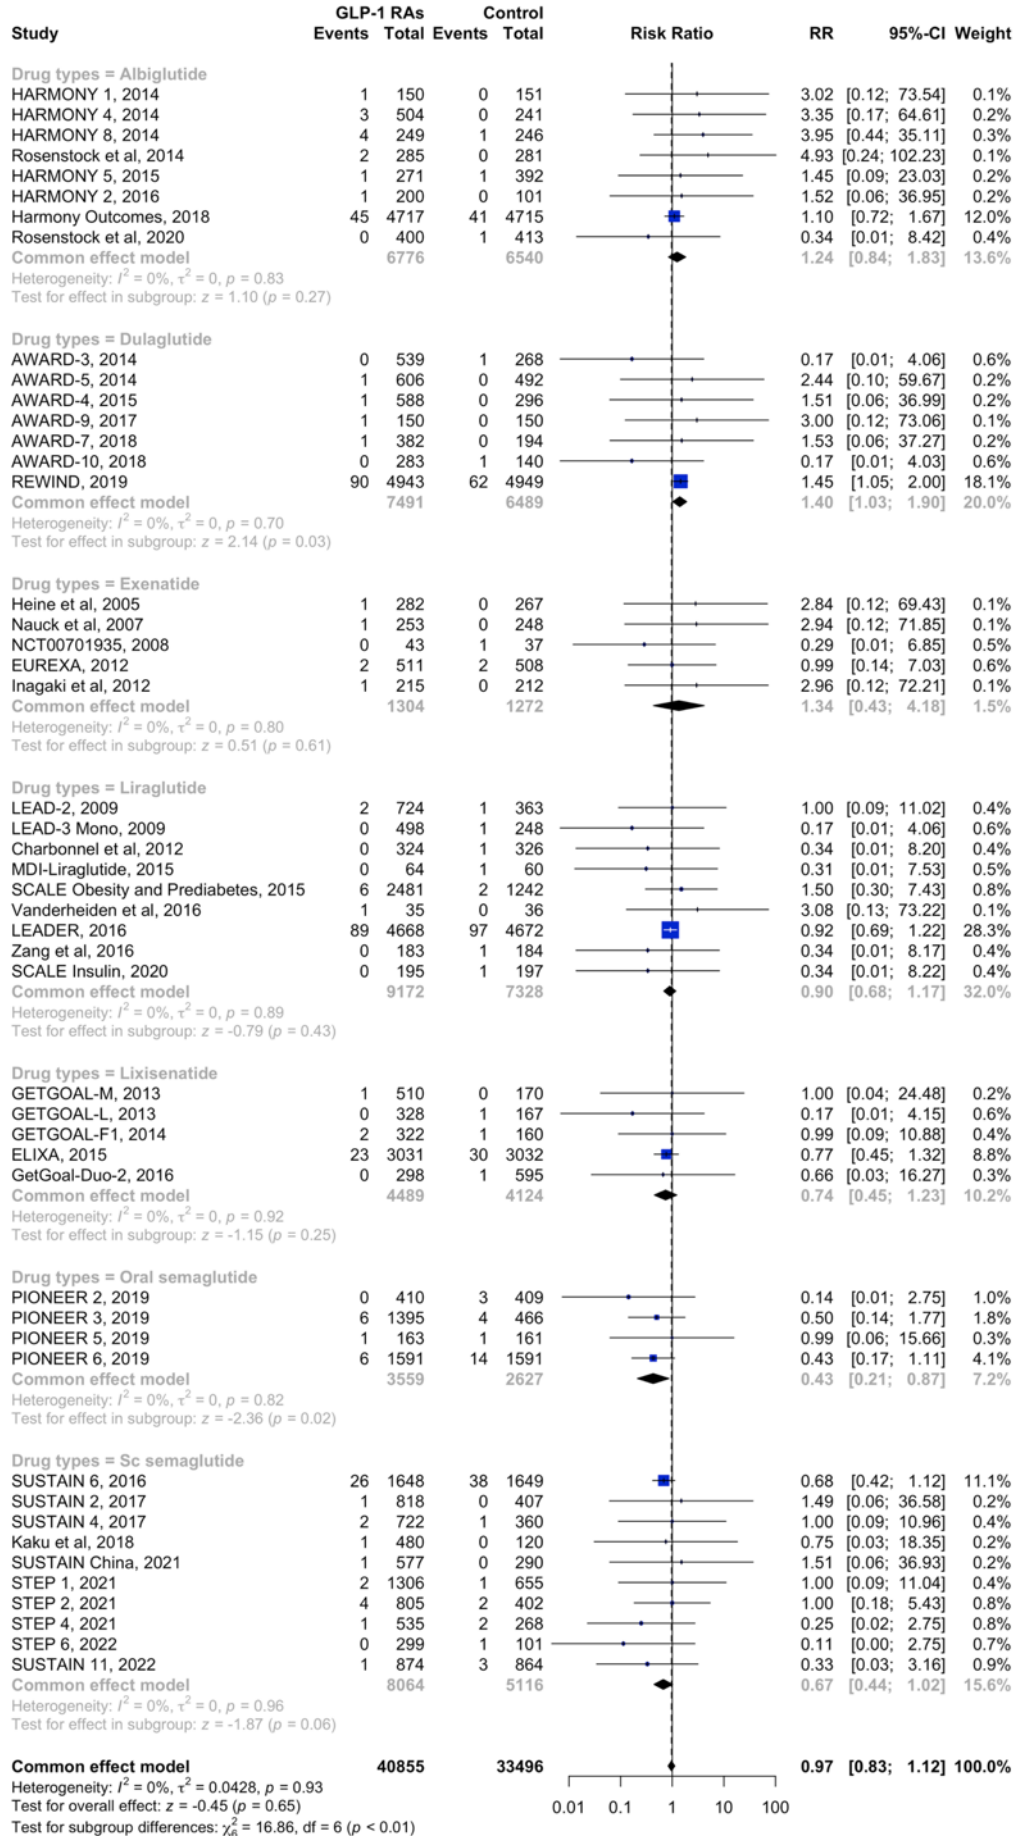

**Figure S3.2.** Effects of different treatment doses of GLP-1 RAs on the association between GLP-1 RAs and the risk of atrial fibrillation

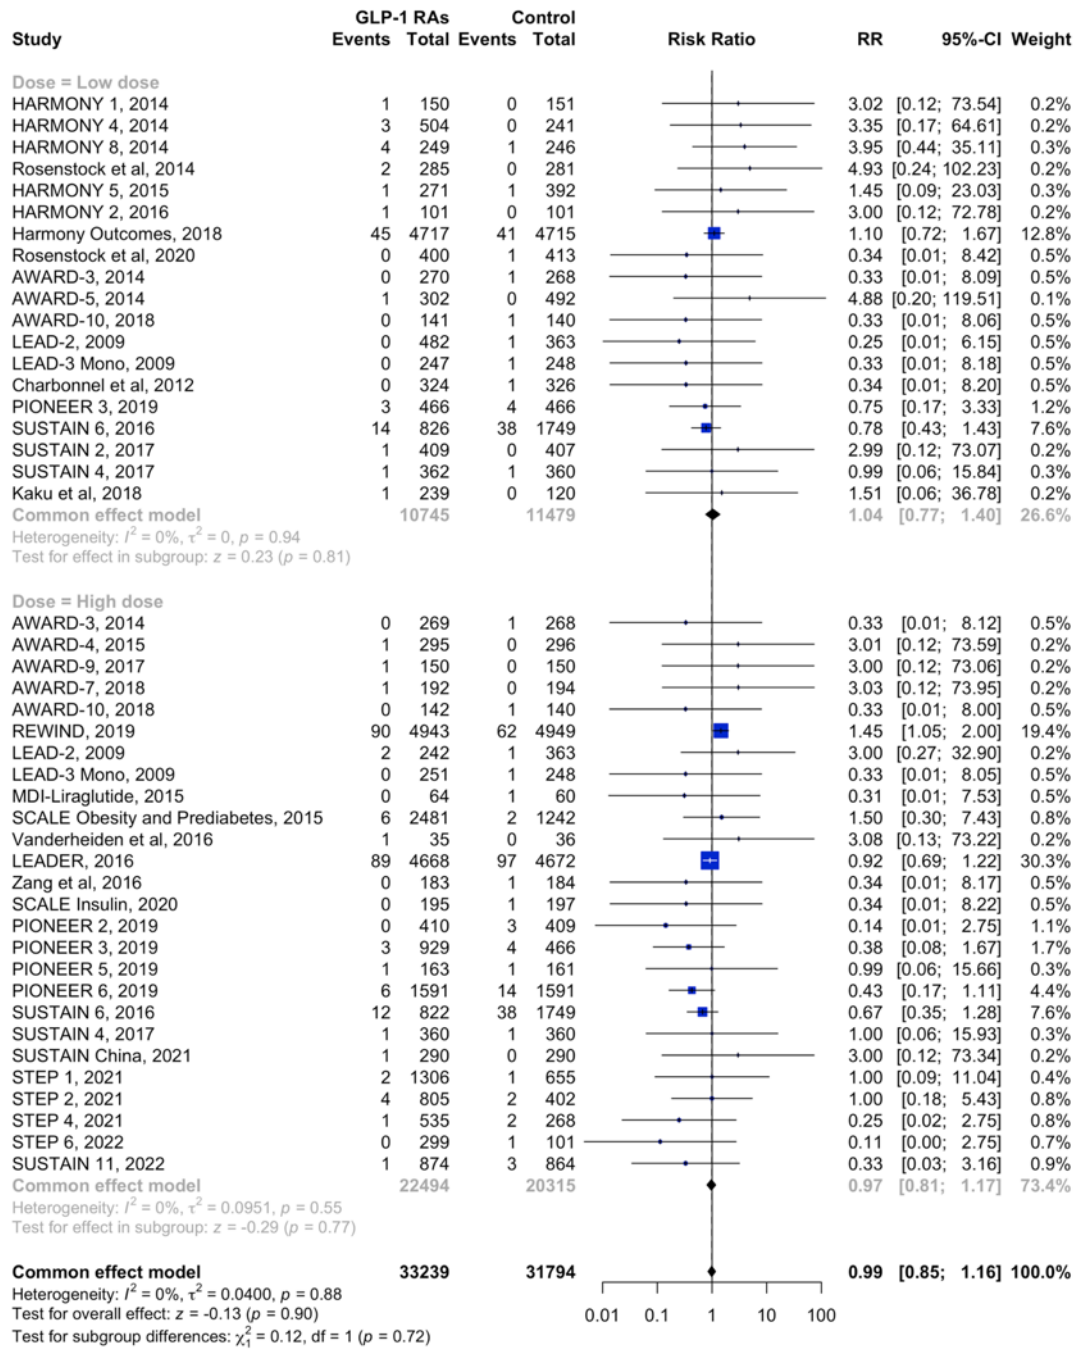

**Figure S3.3.** Effects of follow-up duration on the association between GLP-1 RAs and the risk of atrial fibrillation

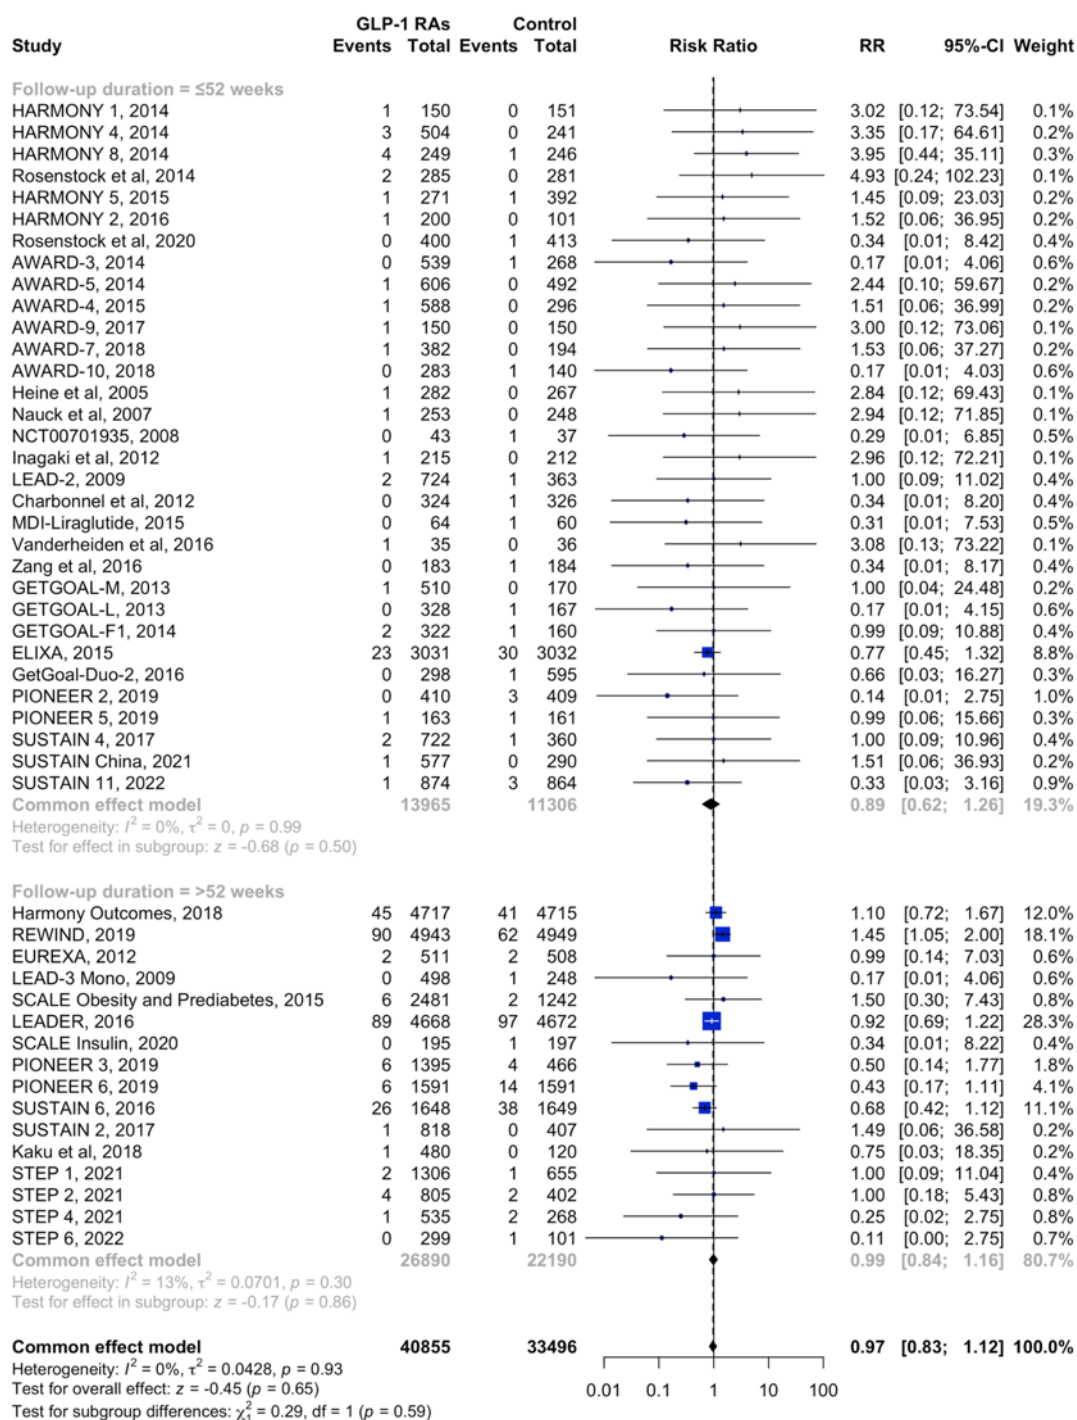



**Figure S3.4.** Effects of baseline BMI on the association between GLP-1 RAs and the risk of atrial fibrillation

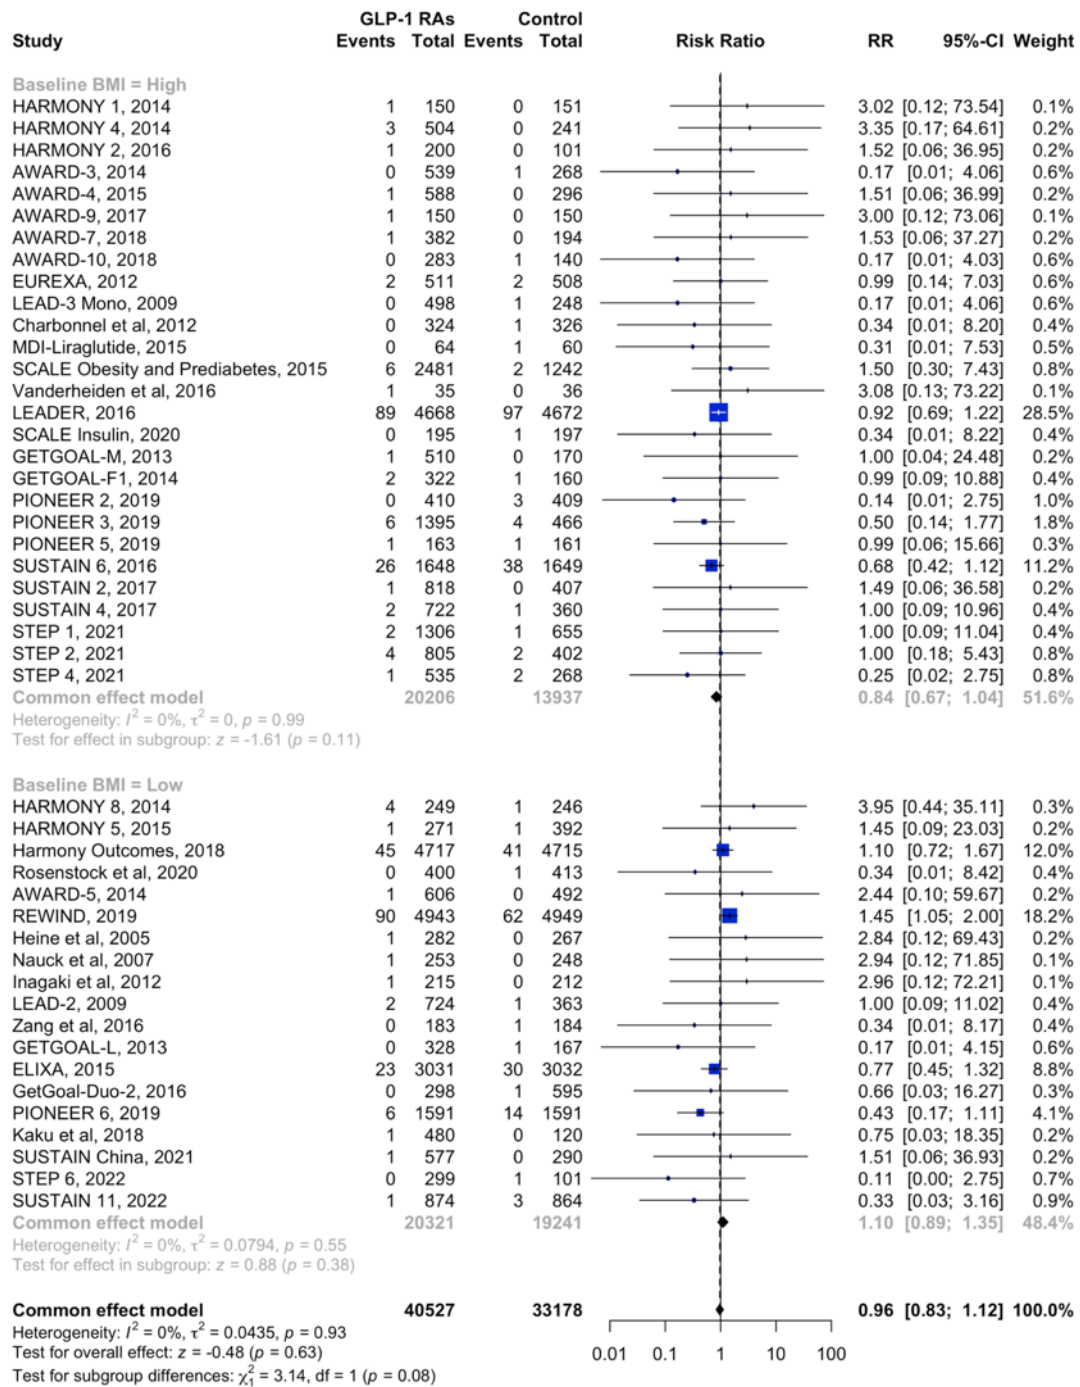

**Figure S3.5.** Effects of study designs on the association between GLP-1 RAs and the risk of atrial fibrillation

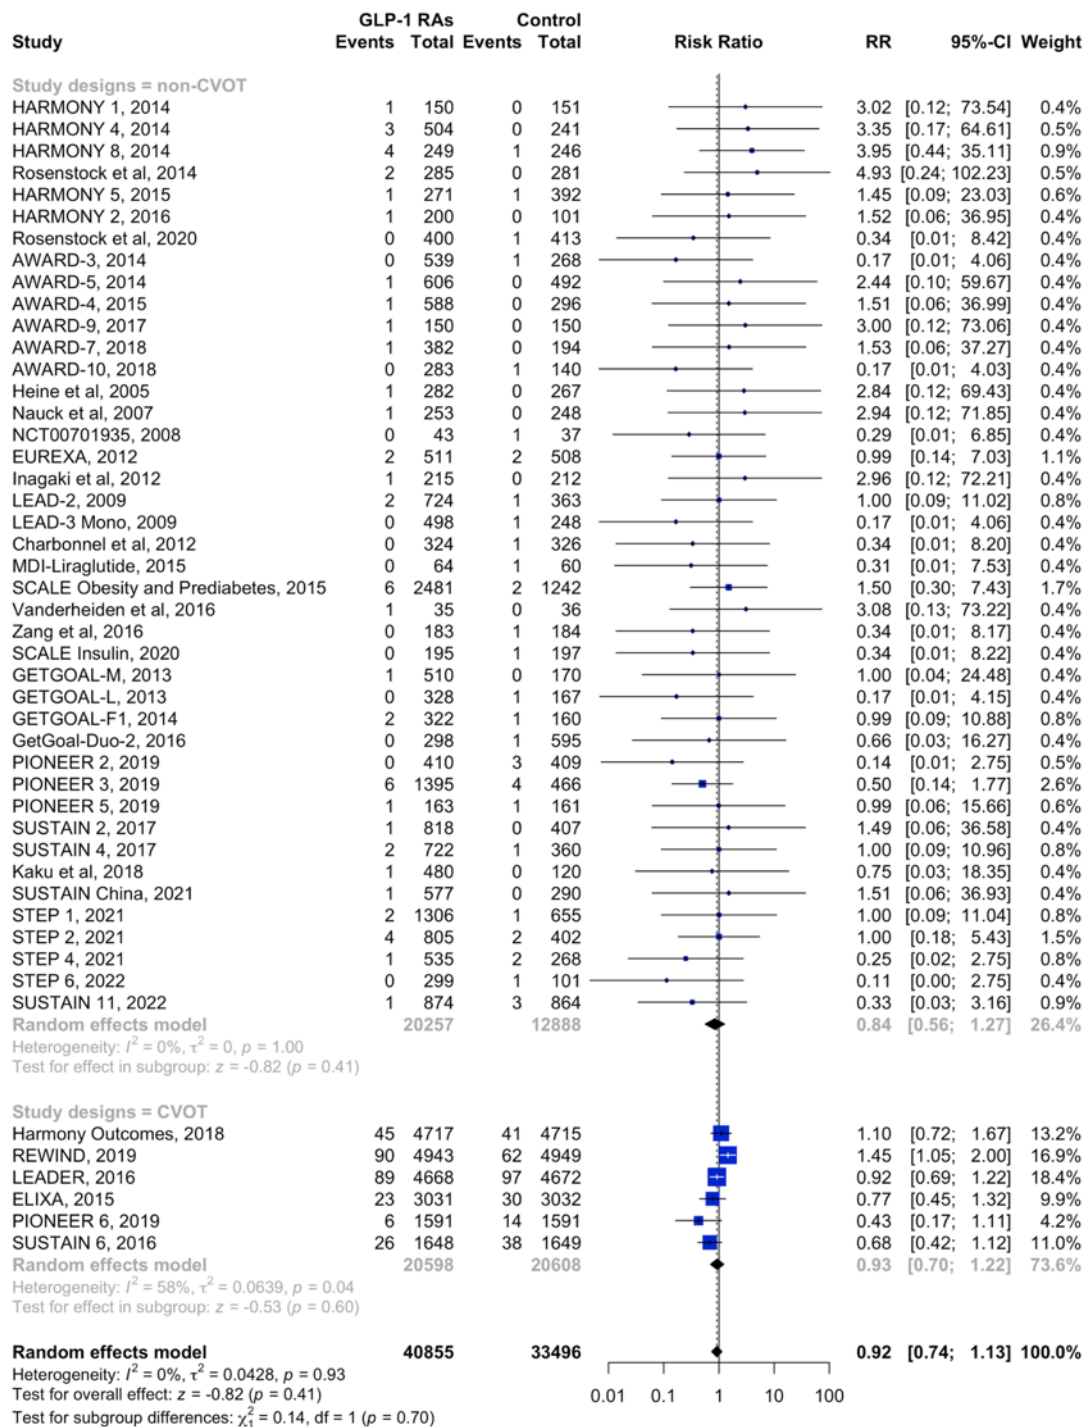

## Figure S4. Subgroup analyses on the association of GLP-1 RAs use with the incidence of atrial flutter

Notes: Experimental, GLP-1RAs treatments; Control, placebo or active control. Study designs: CVOT or non-CVOT. Abbreviations: RR, relative risks; CI, confidential intervals; GLP-1RAs, glucagon-like peptide 1 receptor agonists; BMI, body mass index; CVOT, cardiovascular outcome trial.

**Figure S4.1.** Effects of different types of GLP-1 RAs medications on the association between GLP-1 RAs and the risk of atrial flutter

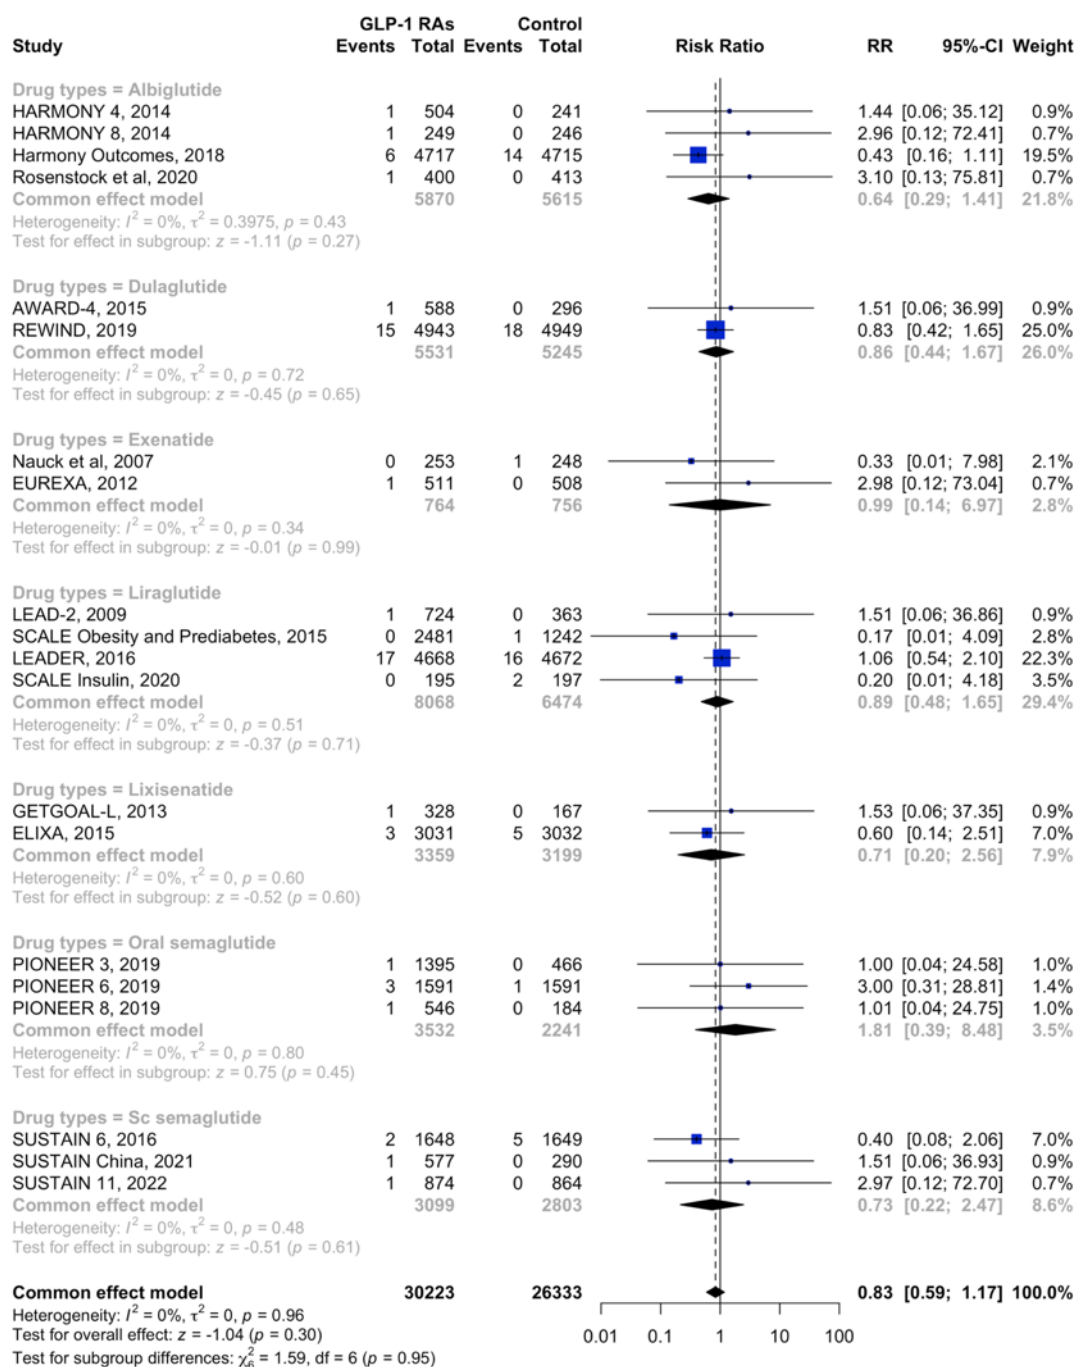

**Figure S4.2.** Effects of different doses of GLP-1 RAs medications on the association between GLP-1 RAs and the risk of atrial flutter

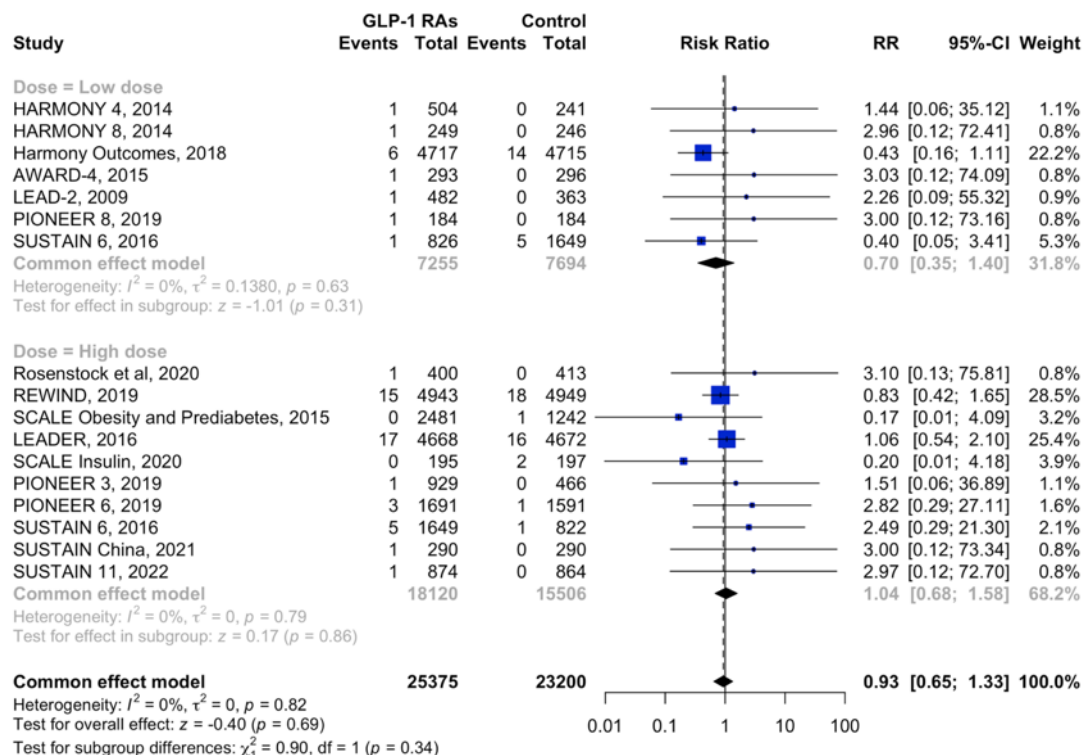

**Figure S4.3.** Effects of follow-up duration on the association between GLP-1 RAs and the risk of atrial flutter

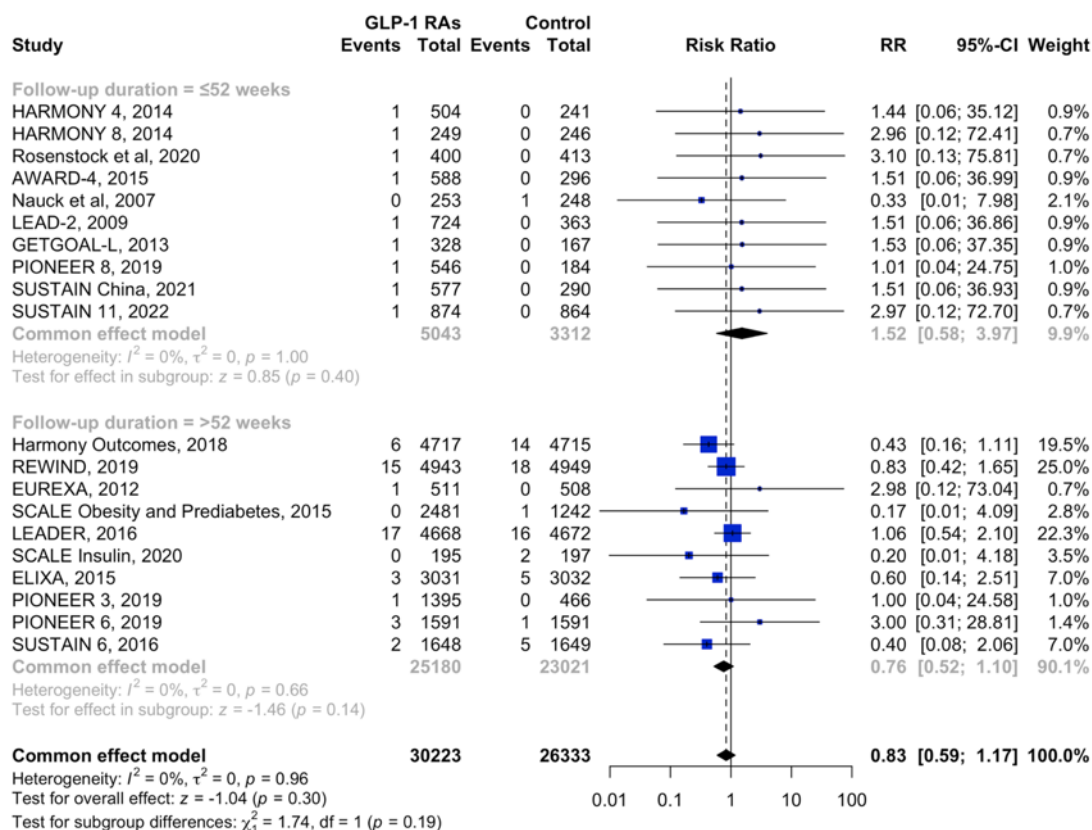

**Figure S4.4.** Effects of baseline BMI on the association between GLP-1 RAs and the risk of atrial flutter

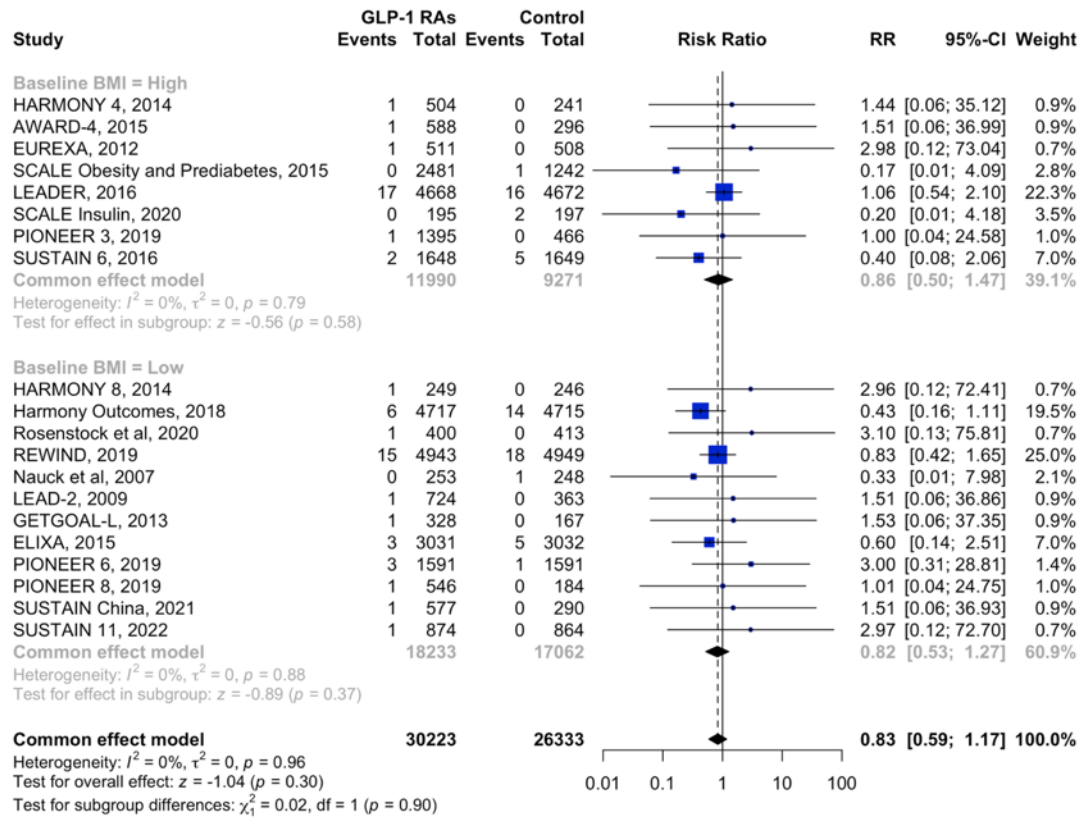

**Figure S4.5.** Effects of study designs on the association between GLP-1 RAs and the risk of atrial flutter

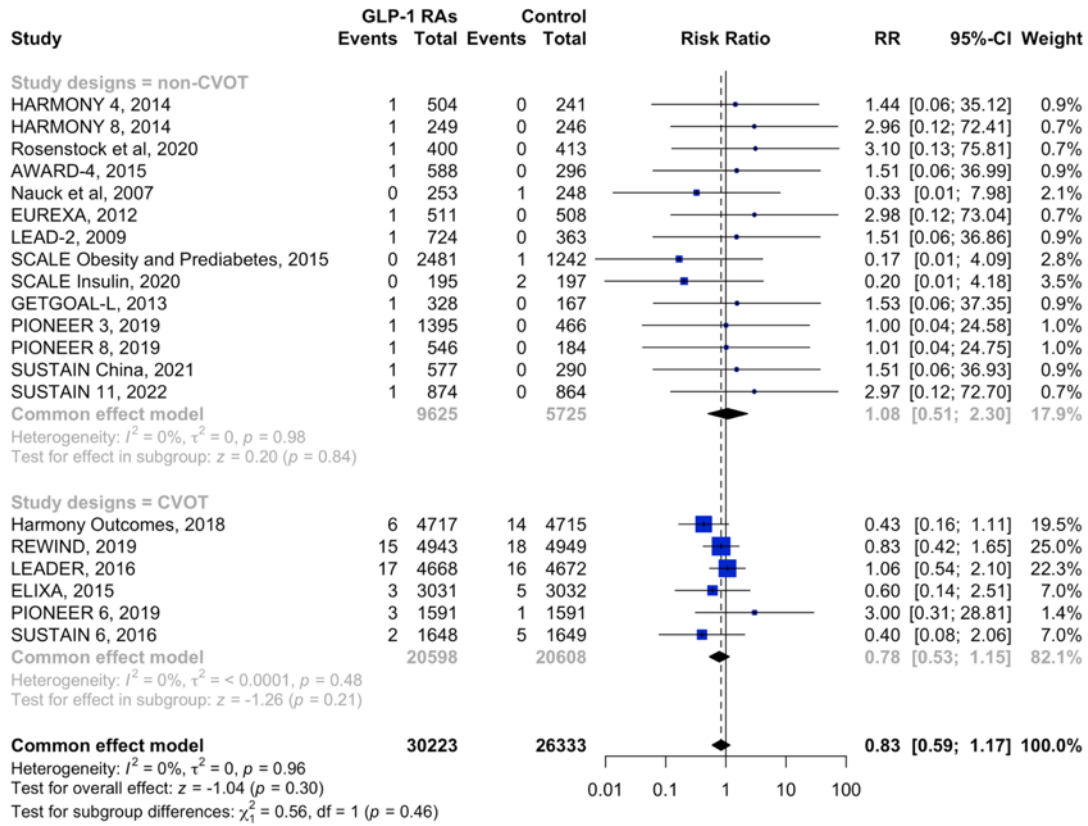

## Figure S5. Subgroup analyses on the association of GLP-1 RAs use with the incidence of ventricular arrhythmias

Notes: Experimental, GLP-1RAs treatments; Control, placebo or active control. Study designs: CVOT or non-CVOT. Abbreviations: RR, relative risks; CI, confidential intervals; GLP-1RAs, glucagon-like peptide 1 receptor agonists; BMI, body mass index; CVOT, cardiovascular outcome trial.

**Figure S5.1.** Effects of different GLP-1 RAs individuals on the association between GLP-1 RAs and the risk of ventricular arrhythmias

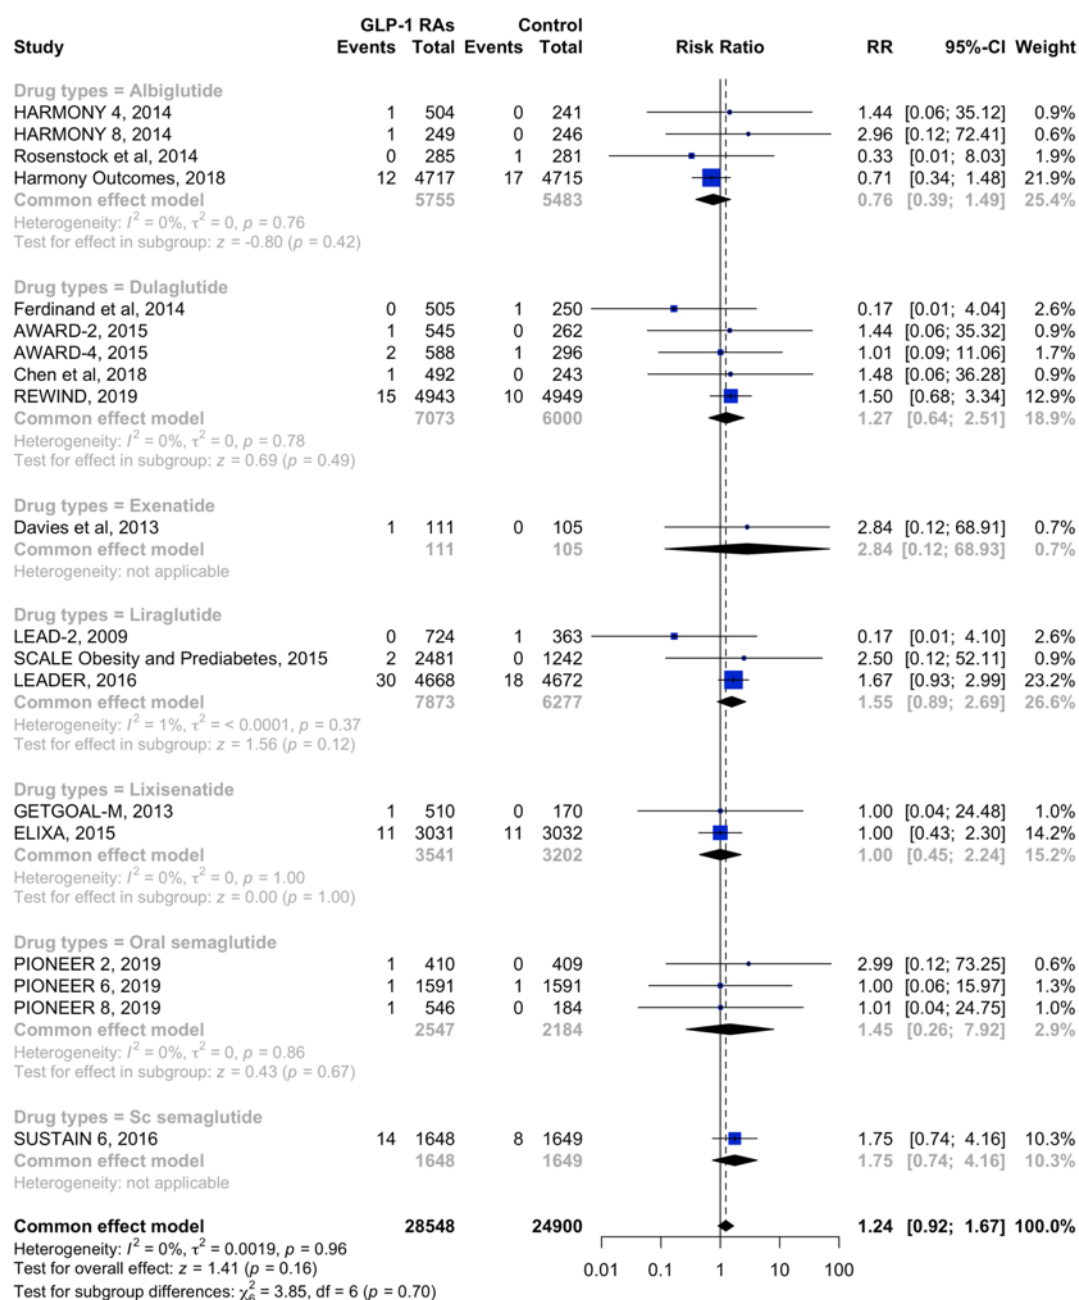

**Figure S5.2.** Effects of treatment doses of GLP-1 RAs medications on the association between GLP-1 RAs and the risk of ventricular arrhythmias

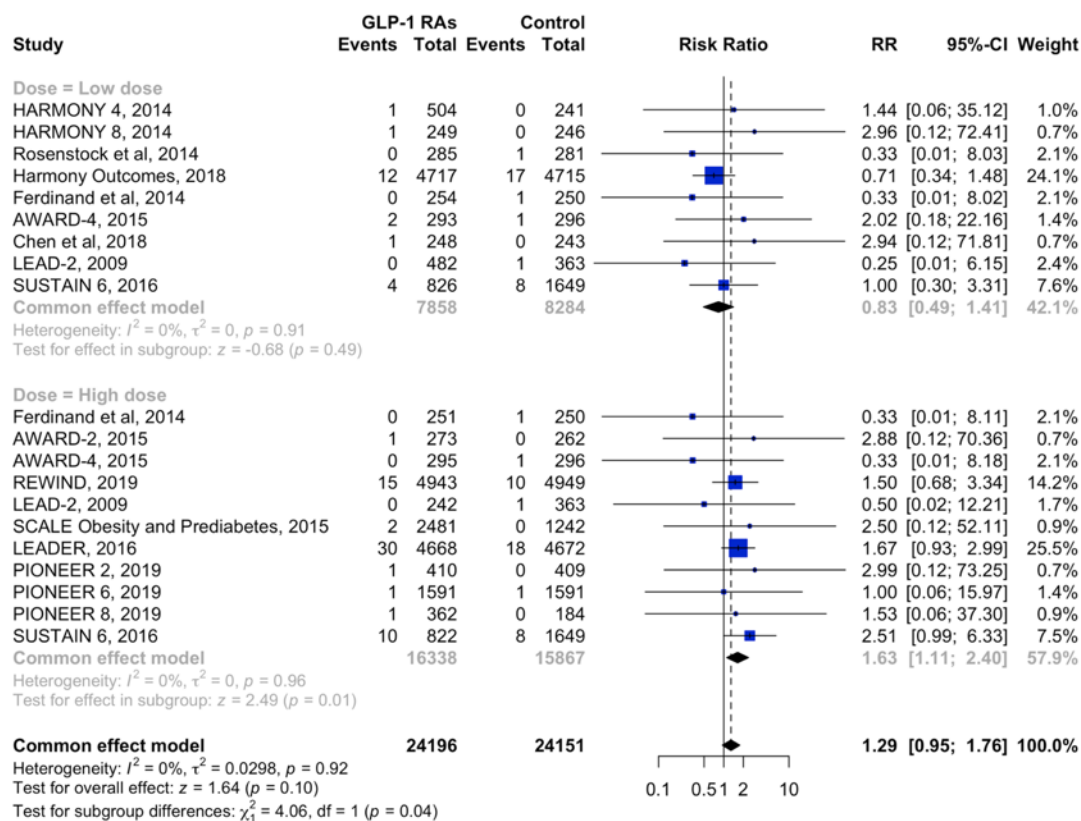



**Figure S5.3.** Effects of follow-up duration on the association between GLP-1 RAs and the risk of ventricular arrhythmias

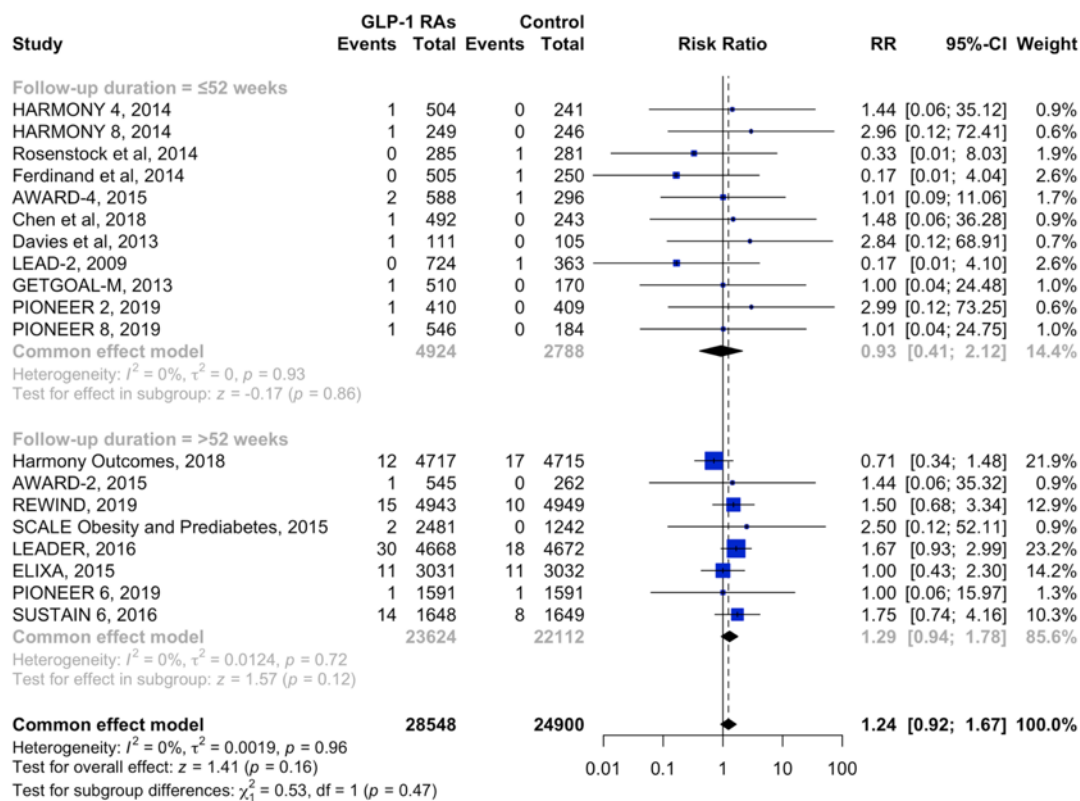

**Figure S5.4.** Effects of baseline BMI on the association between GLP-1 RAs and the risk of ventricular arrhythmias

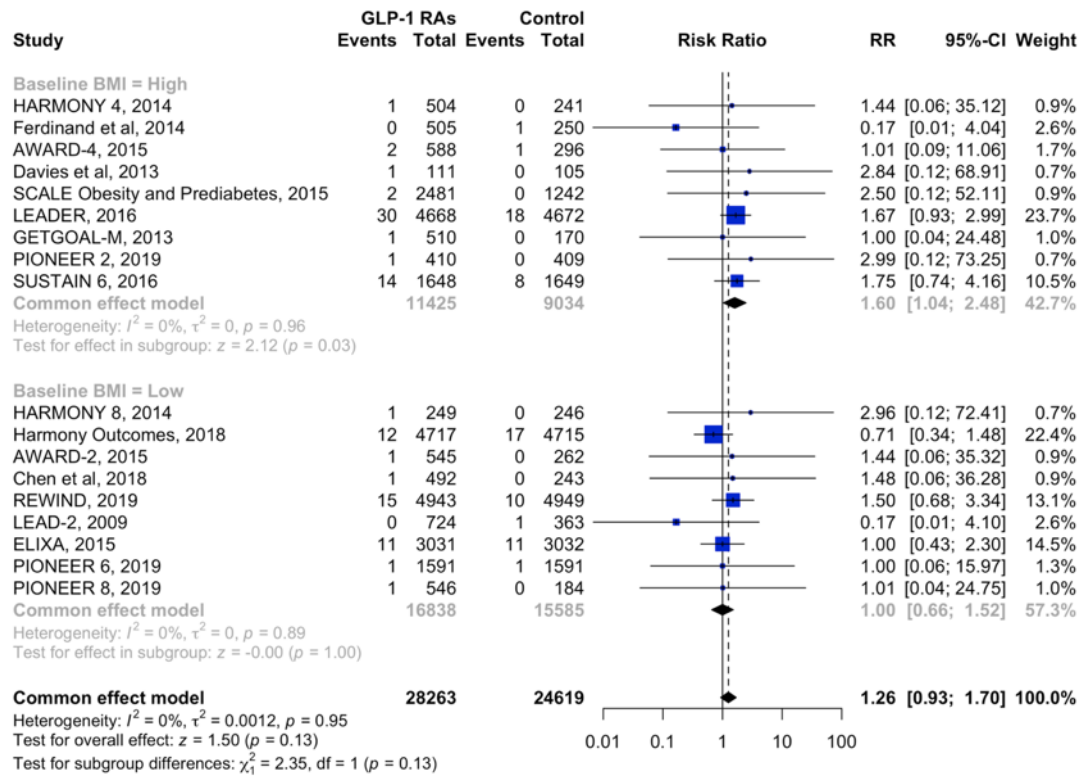

**Figure S5.5.** Effects of study designs on the association between GLP-1 RAs and the risk of ventricular arrhythmias

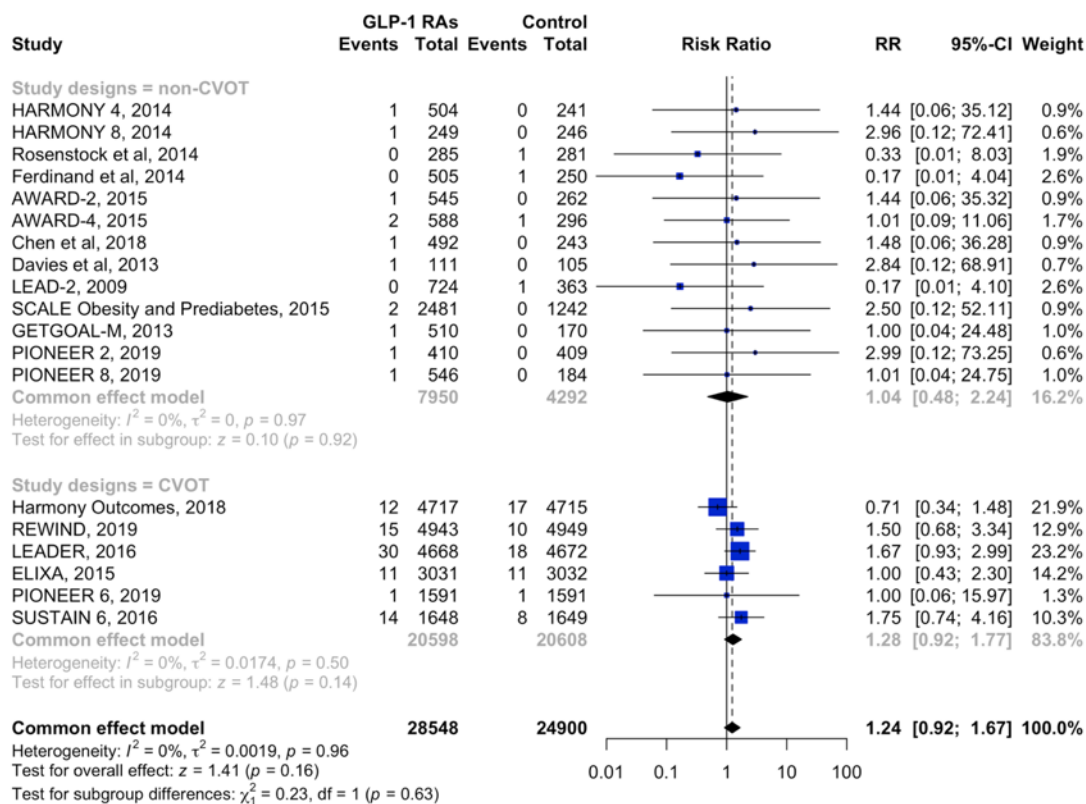

## Figure S6. Subgroup analyses on the association of GLP-1 RAs use with the incidence of sudden cardiac death

Notes: Experimental, GLP-1RAs treatments; Control, placebo or active control. Study designs: CVOT or non-CVOT. Abbreviations: RR, relative risks; CI, confidential intervals; GLP-1RAs, glucagon-like peptide 1 receptor agonists; BMI, body mass index; CVOT, cardiovascular outcome trial.

**Figure S6.1.** Effects of different types of GLP-1 RAs medications on the association between GLP-1 RAs and the risk of sudden cardiac death

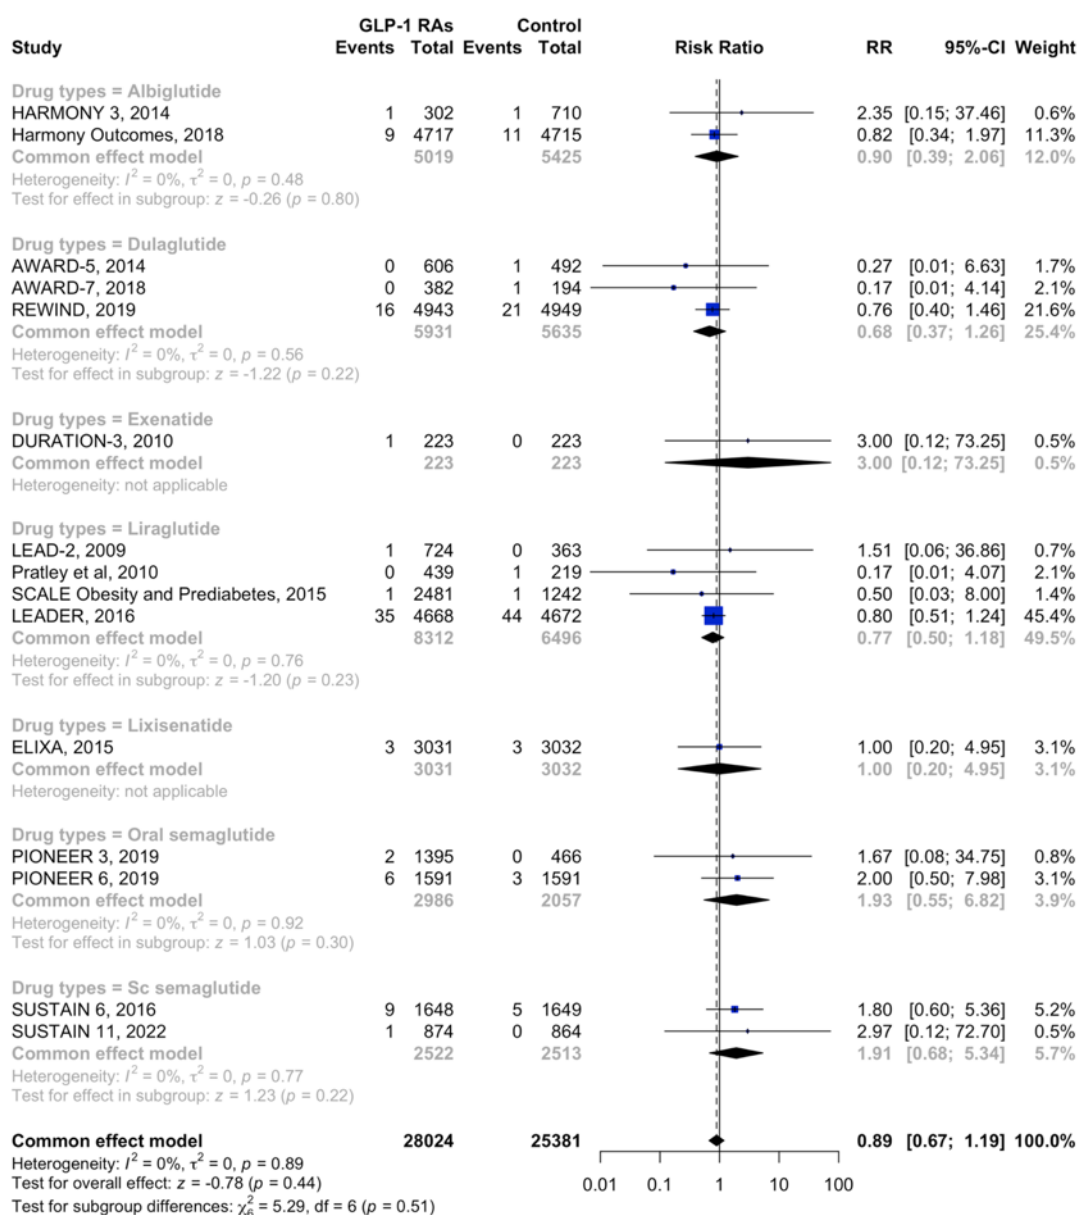

**Figure S6.2.** Effects of treatment doses of GLP-1 RAs medications on the association between GLP-1 RAs and the risk of sudden cardiac death

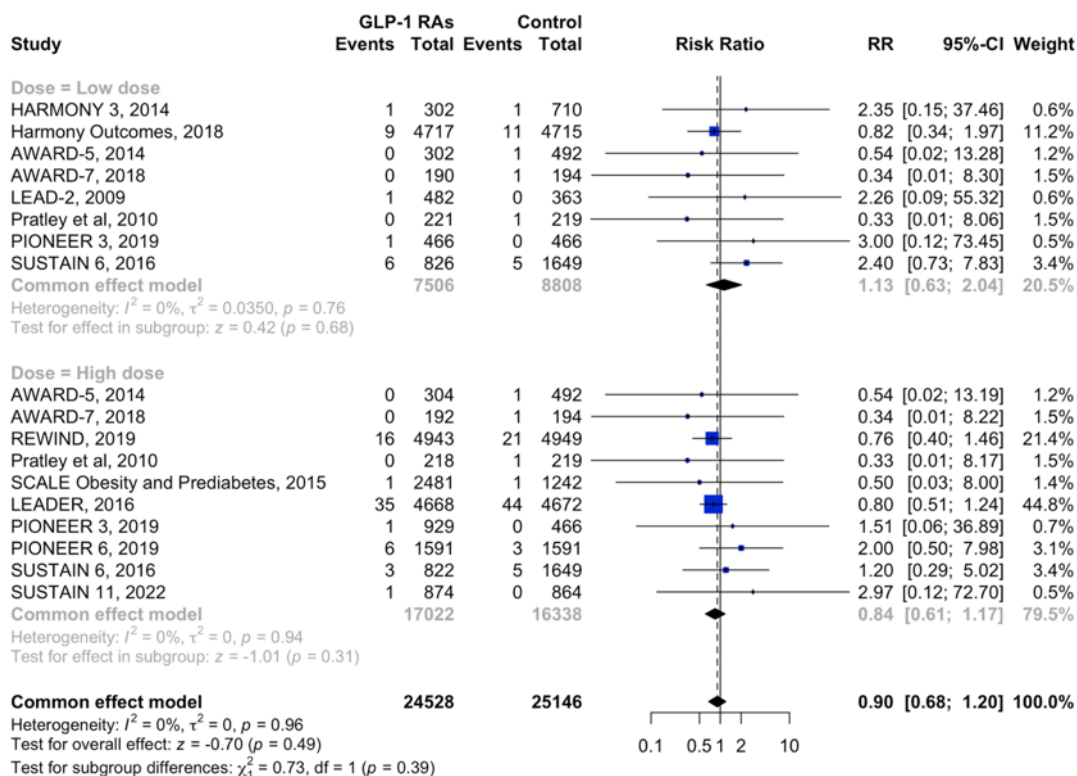

**Figure S6.3.** Effects of follow-up duration on the association between GLP-1 RAs and the risk of sudden cardiac death

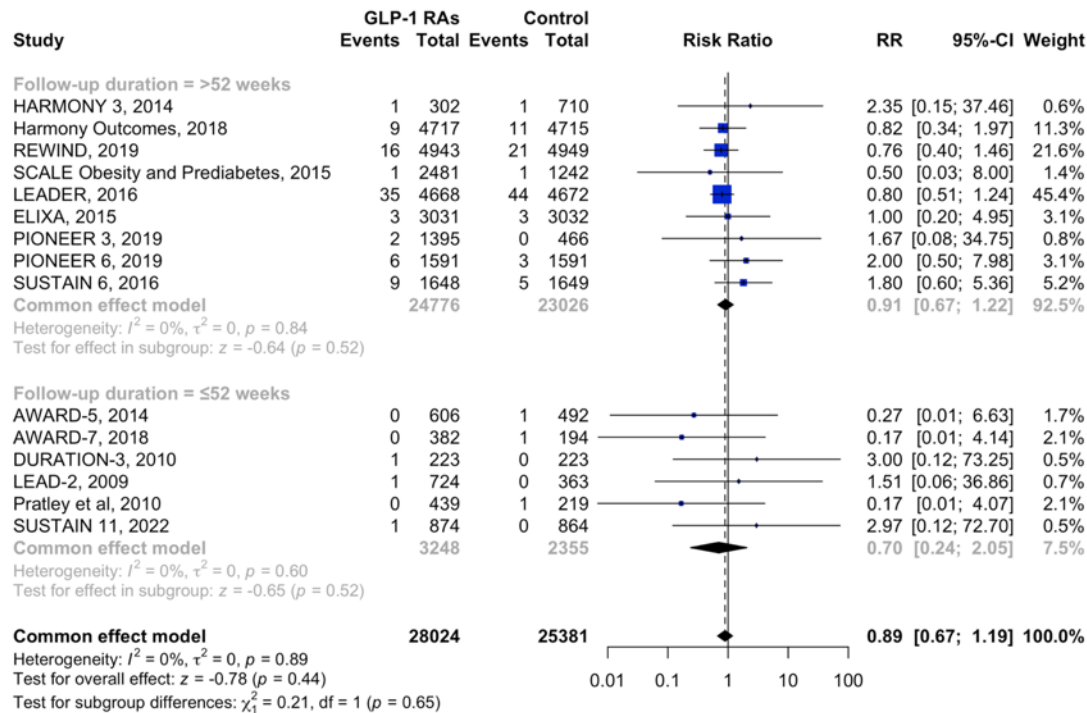

**Figure S6.4.** Effects of baseline BMI on the association between GLP-1 RAs and risks of sudden cardiac death

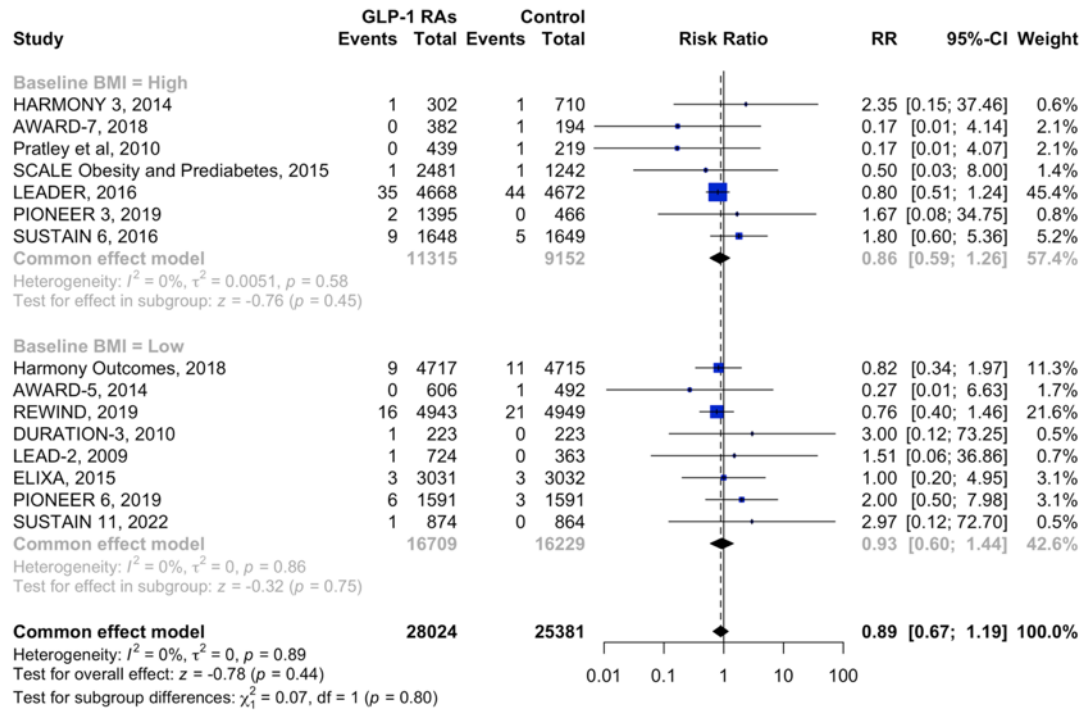

**Figure S6.5.** Effects of study designs on the association between GLP-1 RAs and risks of sudden cardiac death

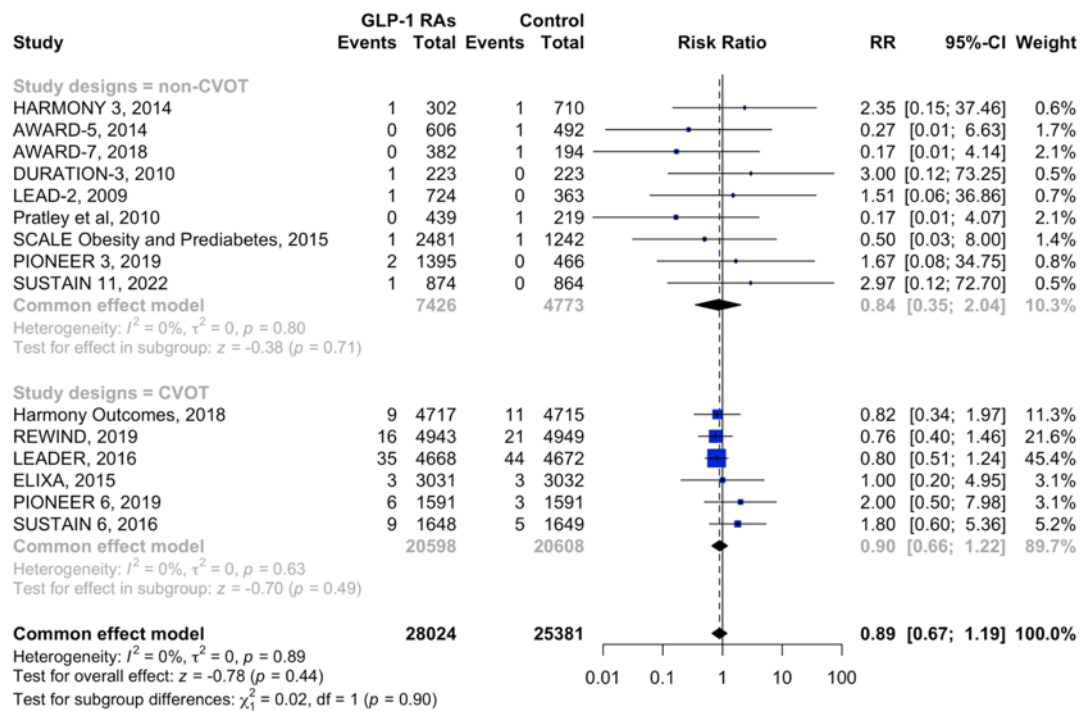

### Figure S7. Sensitivity analyses by omitting each trial one by one of all included studies

Notes: Experimental, GLP-1RAs treatments; Control, placebo or active control. Abbreviations: RR, relative risks; CI, confidential intervals.

Figure S7.1. Sensitivity analysis of all included studies on atrial fibrillation

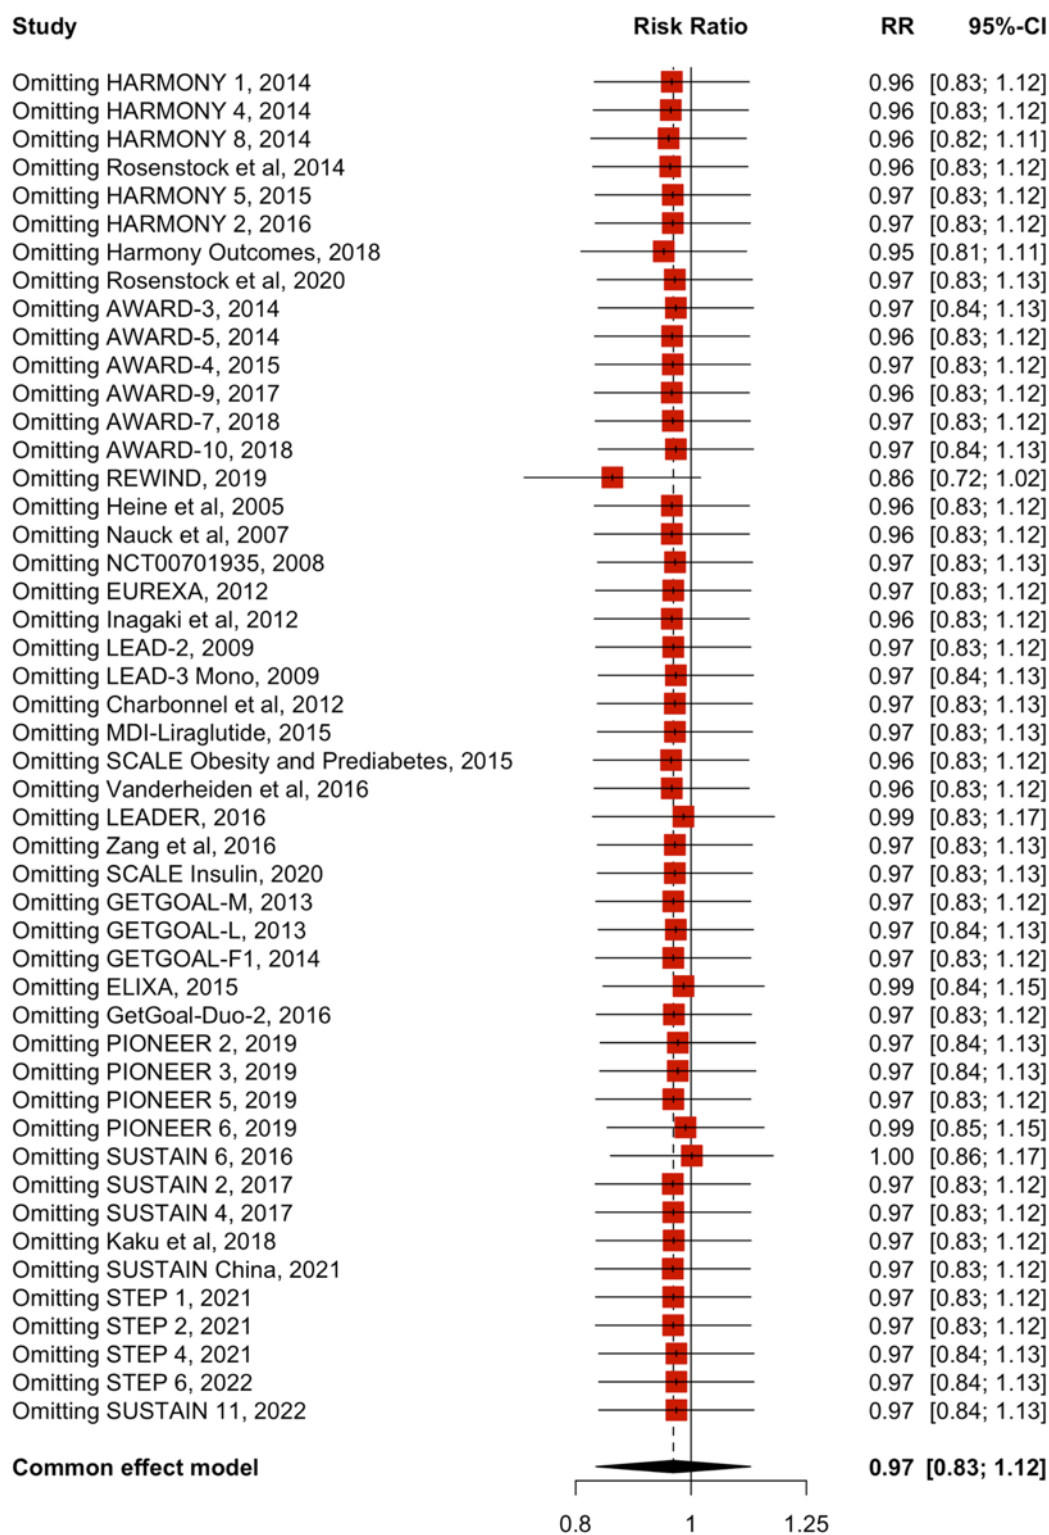

**Figure S7.2.** Sensitivity analysis of all included studies on the association between GLP-1RAs and the risk of atrial flutter

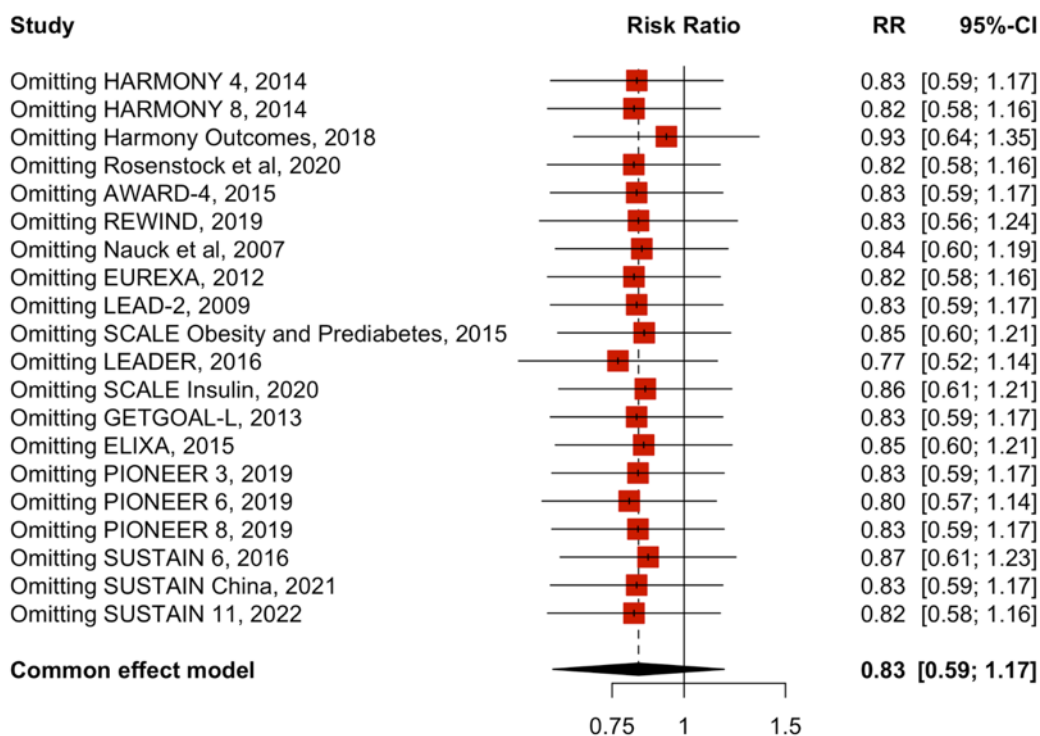

**Figure S7.3.** Sensitivity analysis of all included studies on the association between GLP-1RAs and the risk of ventricular arrhythmias

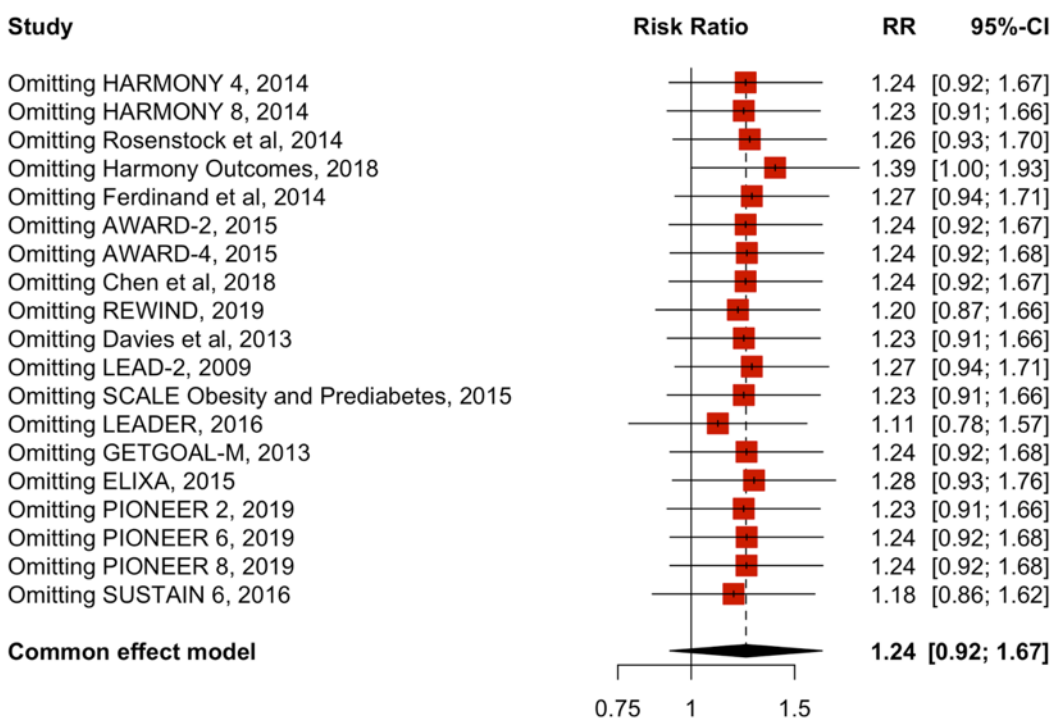



**Figure S7.4.** Sensitivity analysis of all included studies on the association between GLP-1RAs and the risk of sudden cardiac death

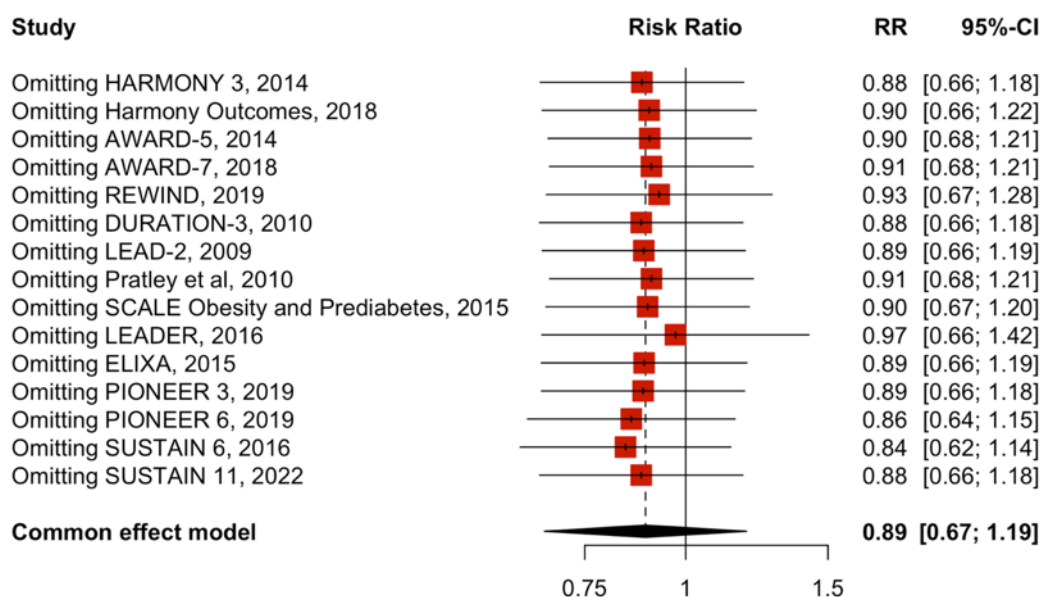

**Figure S7.5.** Sensitivity analysis of studies on the association between dulaglutide and the risk of atrial fibrillation

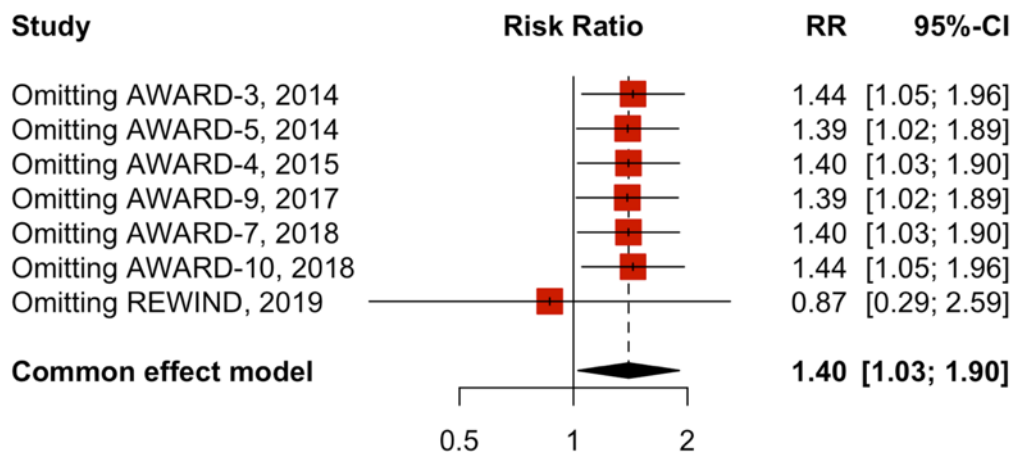

**Figure S7.6.** Sensitivity analysis of studies on the association between oral semaglutide and the risk of atrial fibrillation

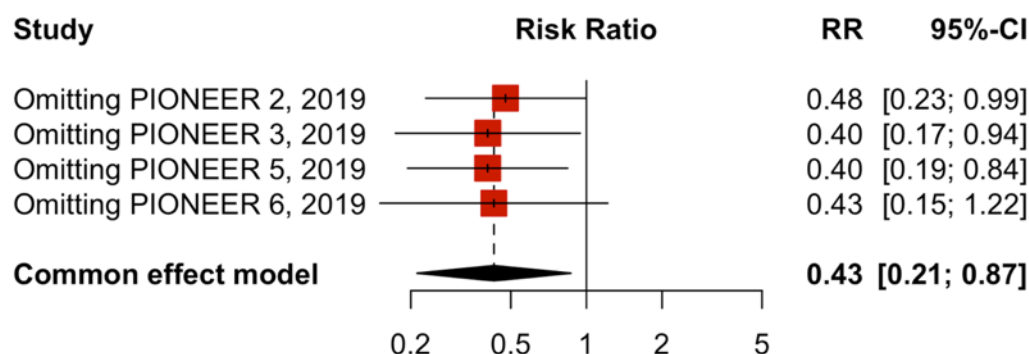

**Figure S7.7.** Sensitivity analysis of studies about the association between high dose of GLP-1RAs and the risk of ventricular arrhythmias

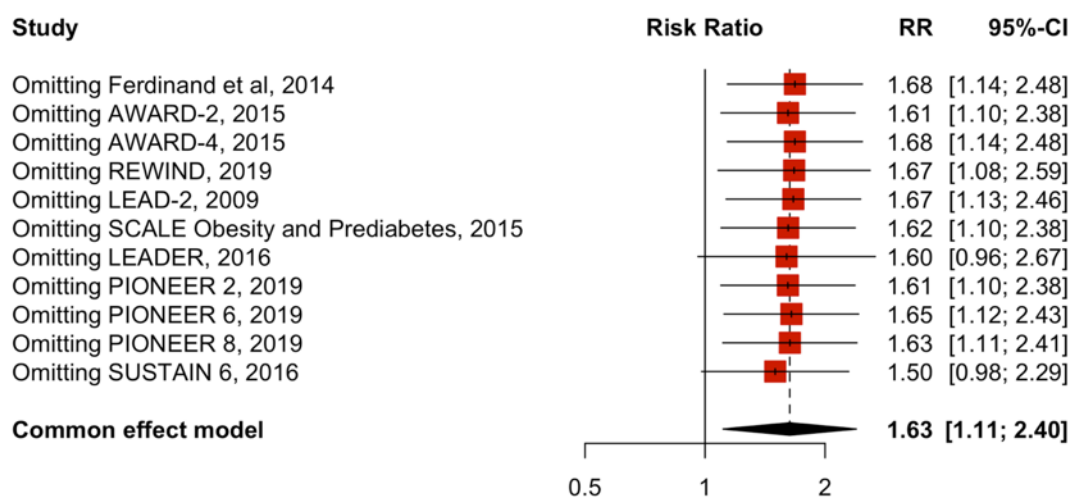

**Figure S7.8.** Sensitivity analysis of studies about the association between high baseline BMI and the risk of ventricular arrhythmias.

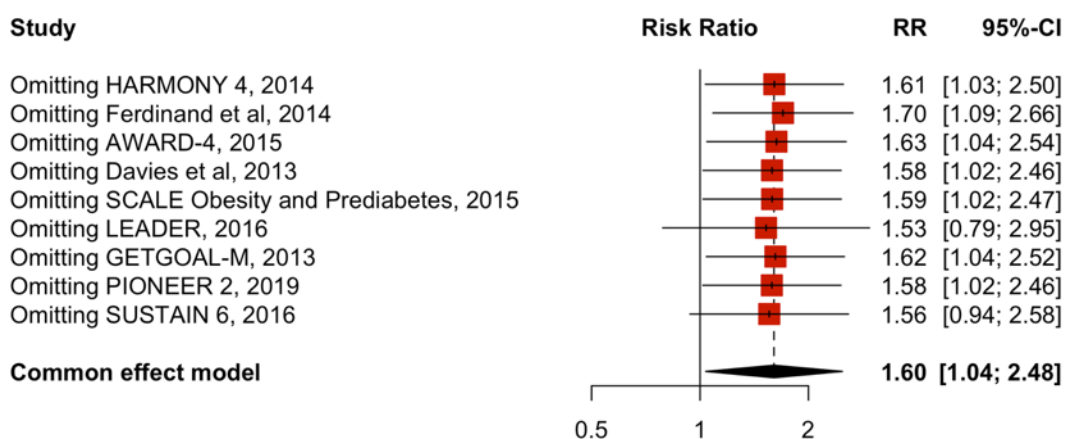

**Figure S8. Funnel plots for each outcome**

Abbreviations: GLP-1RAs, glucagon-like peptide 1 receptor agonists.

**Figure S8.1.** Funnel plot of studies included for the association between GLP-1RAs and the risk of atrial fibrillation

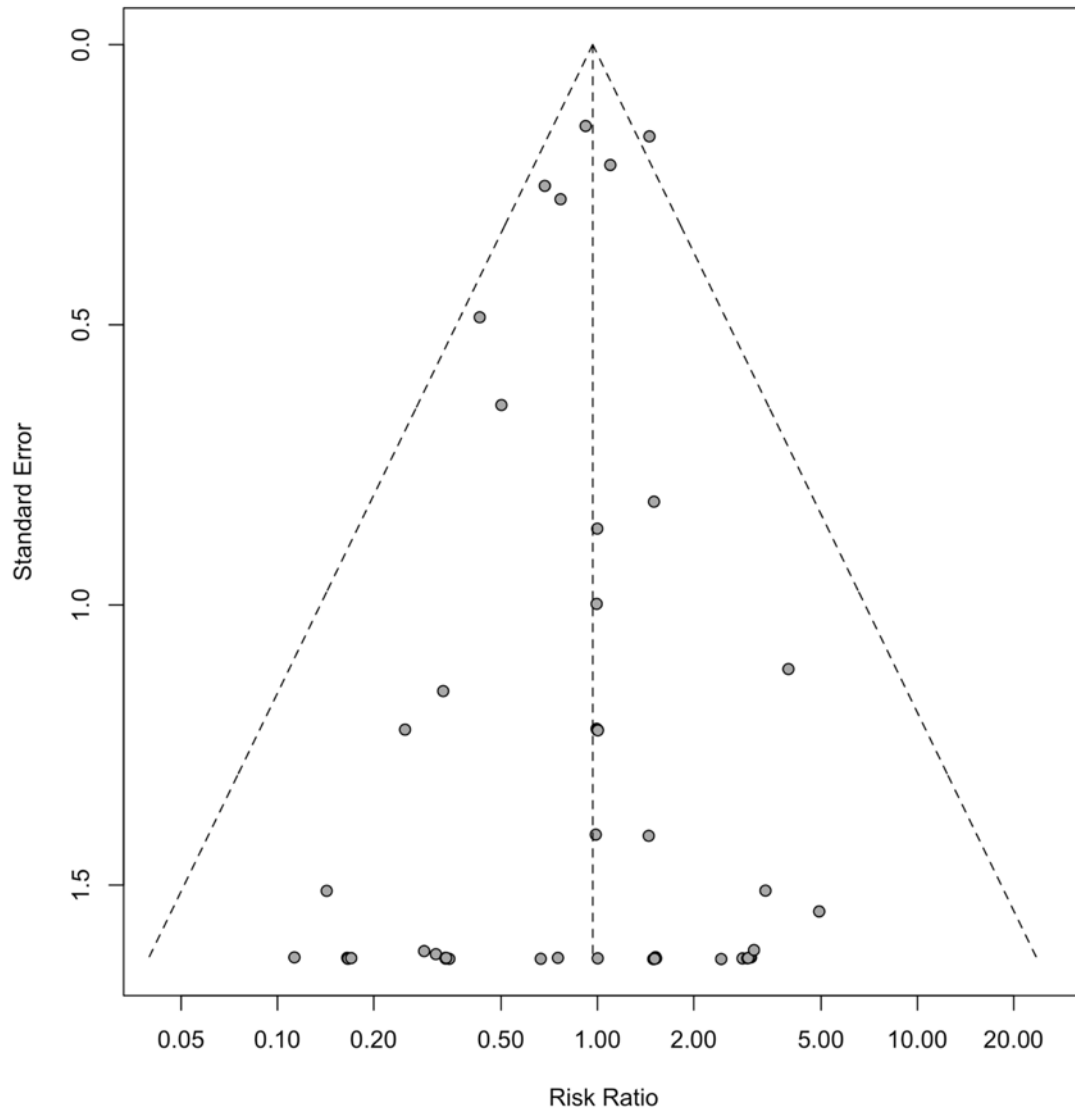

**Figure S8.2.** Funnel plot of studies included for the association between GLP-1RAs and the risk of atrial flutter

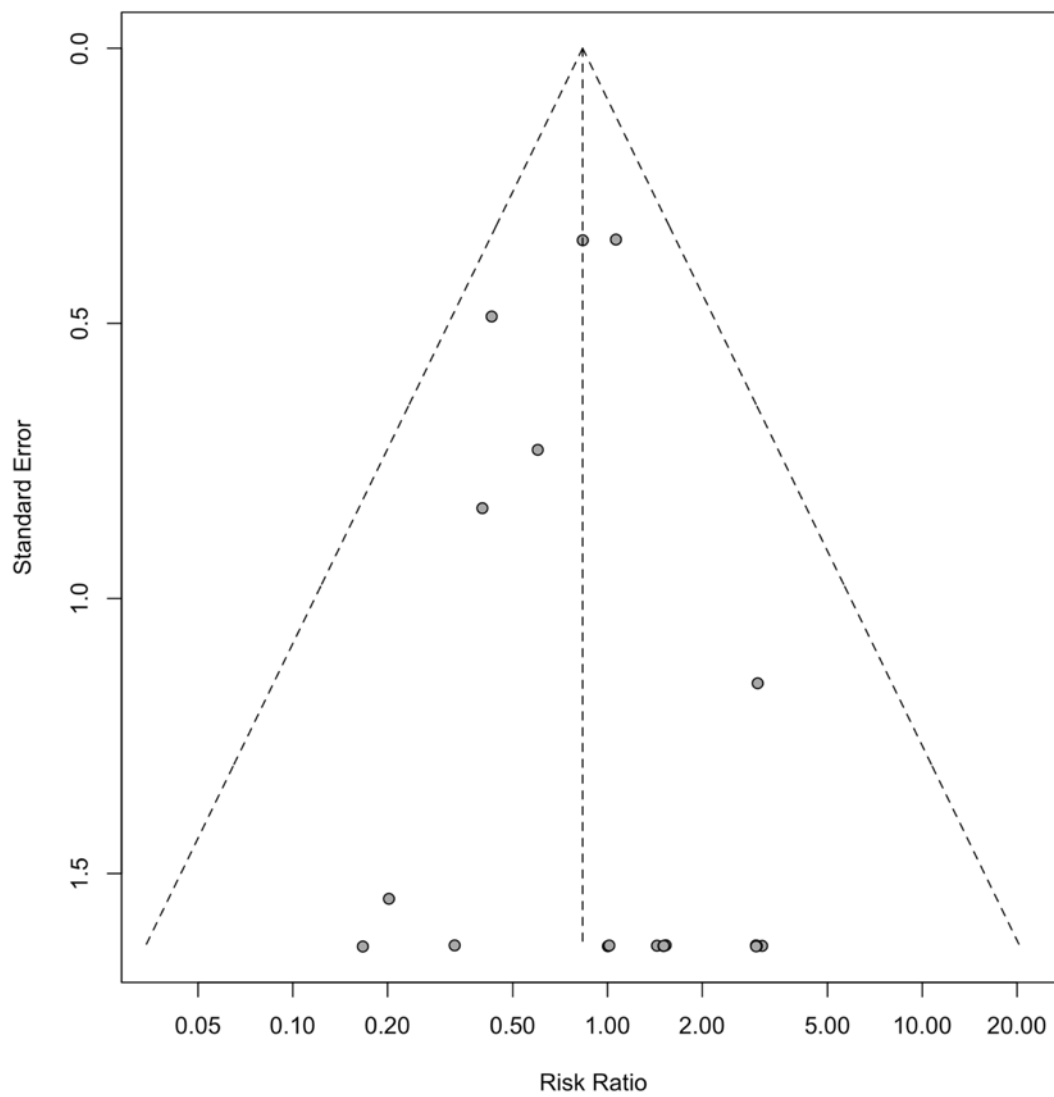

**Figure S8.3.** Funnel plot of studies included for the association between GLP-1RAs and the risk of ventricular arrhythmias

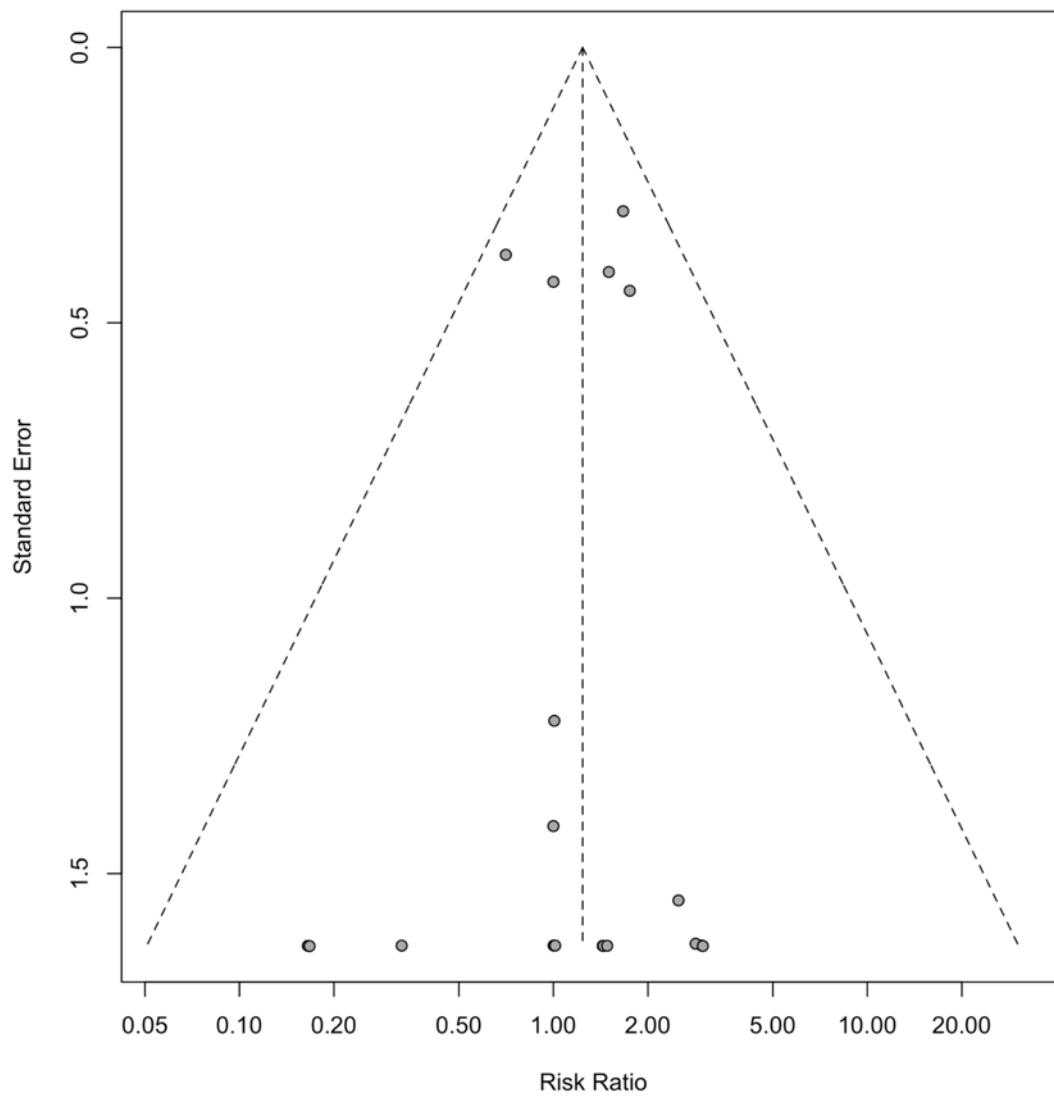

**Figure S8.4.** Funnel plot of studies included for the association between GLP-1RAs and the risks of sudden cardiac death

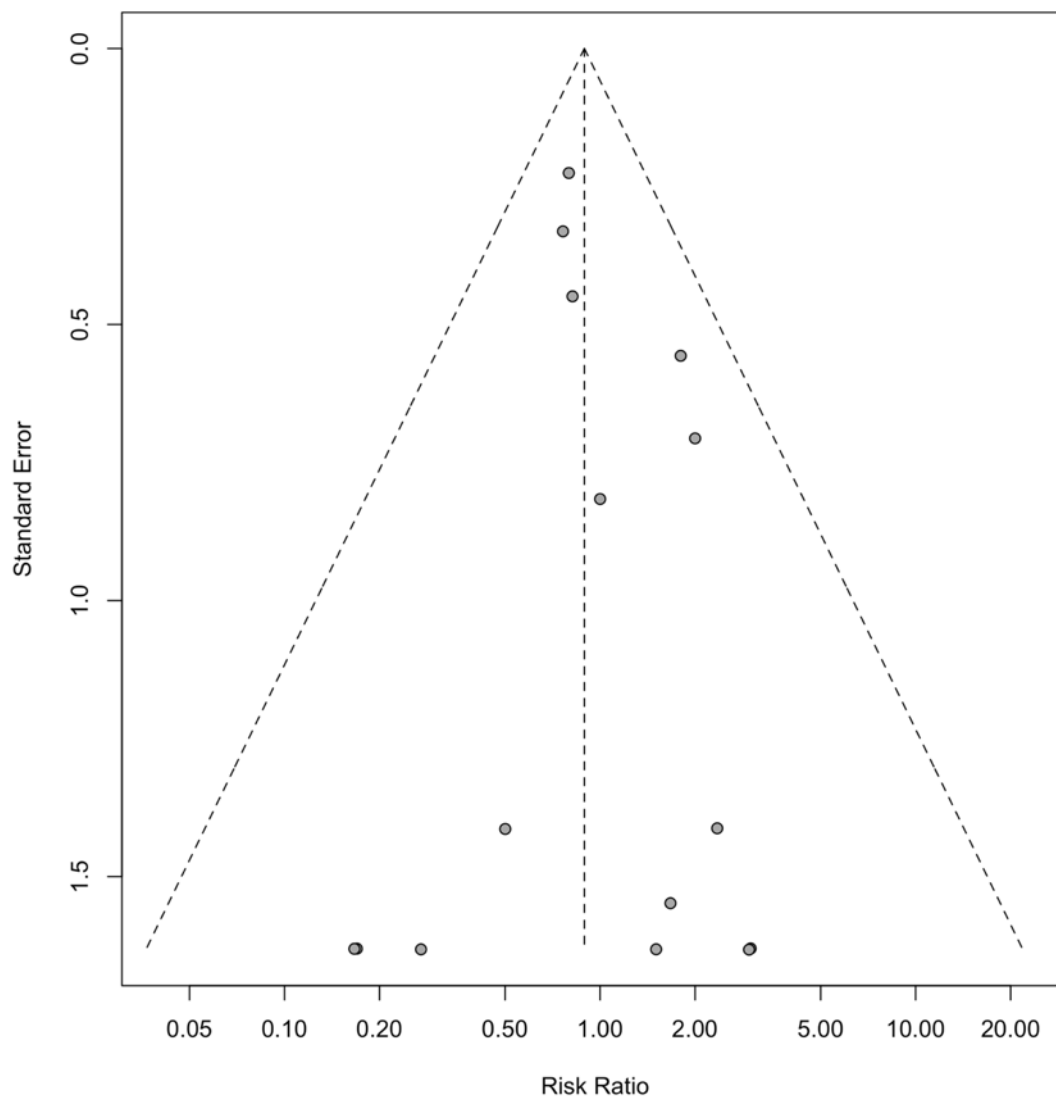

## References S1

1. Reusch J, Stewart MW, Perkins CM, Cirkel DT, Ye J, et al. Efficacy and safety of once-weekly glucagon-like peptide 1 receptor agonist albiglutide (HARMONY 1 trial): 52-week primary endpoint results from a randomized, double-blind, placebo-controlled trial in patients with type 2 diabetes mellitus not controlled on pioglitazone, with or without metformin. *Diabetes Obes Metab.* 2014;16:1257-64.
2. Ahrén B, Johnson SL, Stewart M, Cirkel DT, Yang F, et al. HARMONY 3: 104-week randomized, double-blind, placebo- and active-controlled trial assessing the efficacy and safety of albiglutide compared with placebo, sitagliptin, and glimepiride in patients with type 2 diabetes taking metformin. *Diabetes Care.* 2014;37:2141-8.
3. Weissman PN, Carr MC, Ye J, Cirkel DT, Stewart M, et al. HARMONY 4: randomised clinical trial comparing once-weekly albiglutide and insulin glargine in patients with type 2 diabetes inadequately controlled with metformin with or without sulfonylurea. *Diabetologia.* 2014;57:2475-84.
4. Leiter LA, Carr MC, Stewart M, Jones-Leone A, Scott R, et al. Efficacy and safety of the once-weekly GLP-1 receptor agonist albiglutide versus sitagliptin in patients with type 2 diabetes and renal impairment: a randomized phase III study. *Diabetes Care.* 2014;37:2723-30.
5. Rosenstock J, Fonseca VA, Gross JL, Ratner RE, Ahrén B, et al. Advancing basal insulin replacement in type 2 diabetes inadequately controlled with insulin glargine plus oral agents: A comparison of adding albiglutide, a weekly GLP-1 receptor agonist, versus thrice-daily prandial insulin lispro. *Diabetes Care.* 2014;37:2317-25.
6. Home PD, Shamanna P, Stewart M, Yang F, Miller M, et al. Efficacy and tolerability of albiglutide versus placebo or pioglitazone over 1 year in people with type 2 diabetes currently taking metformin and glimepiride: HARMONY 5. *Diabetes Obes Metab.* 2015;17:179-87.
7. Nauck MA, Stewart MW, Perkins C, Jones-Leone A, Yang F, et al. Efficacy and safety of once-weekly GLP-1 receptor agonist albiglutide (HARMONY 2):

- 52 week primary endpoint results from a randomised, placebo-controlled trial in patients with type 2 diabetes mellitus inadequately controlled with diet and exercise. *Diabetologia*. 2016;59:266-74.
8. Hernandez AF, Green JB, Janmohamed S, D'Agostino RB, Sr., Granger CB, et al. Albiglutide and cardiovascular outcomes in patients with type 2 diabetes and cardiovascular disease (Harmony Outcomes): a double-blind, randomised placebo-controlled trial. *Lancet*. 2018;392:1519-29.
  9. Rosenstock J, Nino A, Soffer J, Erskine L, Acosta A, et al. Impact of a Weekly Glucagon-Like Peptide 1 Receptor Agonist, Albiglutide, on Glycemic Control and on Reducing Prandial Insulin Use in Type 2 Diabetes Inadequately Controlled on Multiple Insulin Therapy: A Randomized Trial. *Diabetes Care*. 2020;43:2509-18.
  10. Ferdinand KC, White WB, Calhoun DA, Lonn EM, Sager PT, et al. Effects of the once-weekly glucagon-like peptide-1 receptor agonist dulaglutide on ambulatory blood pressure and heart rate in patients with type 2 diabetes mellitus. *Hypertension*. 2014;64:731-7.
  11. Umpierrez G, Tofé Povedano S, Pérez Manghi F, Shurzinske L, Pechtner V. Efficacy and safety of dulaglutide monotherapy versus metformin in type 2 diabetes in a randomized controlled trial (AWARD-3). *Diabetes Care*. 2014;37:2168-76.
  12. Nauck M, Weinstock RS, Umpierrez GE, Guerci B, Skrivanek Z, et al. Efficacy and safety of dulaglutide versus sitagliptin after 52 weeks in type 2 diabetes in a randomized controlled trial (AWARD-5) *Diabetes Care*. 2014;37:2149-58.
  13. Giorgino F, Benroubi M, Sun JH, Zimmermann AG, Pechtner V. Efficacy and Safety of Once-Weekly Dulaglutide Versus Insulin Glargine in Patients With Type 2 Diabetes on Metformin and Glimepiride (AWARD-2). *Diabetes Care*. 2015;38:2241-9.
  14. Blonde L, Jendle J, Gross J, Woo V, Jiang H, et al. Once-weekly dulaglutide versus bedtime insulin glargine, both in combination with prandial insulin lispro, in patients with type 2 diabetes (AWARD-4): a randomised, open-label, phase 3, non-inferiority study. *Lancet*. 2015;385:2057-66.



15. Pozzilli P, Norwood P, Jódar E, Davies MJ, Ivanyi T, et al. Placebo-controlled, randomized trial of the addition of once-weekly glucagon-like peptide-1 receptor agonist dulaglutide to titrated daily insulin glargine in patients with type 2 diabetes (AWARD-9). *Diabetes Obes Metab.* 2017;19:1024-31.
16. Tuttle KR, Lakshmanan MC, Rayner B, Busch RS, Zimmermann AG, et al. Dulaglutide versus insulin glargine in patients with type 2 diabetes and moderate-to-severe chronic kidney disease (AWARD-7): a multicentre, open-label, randomised trial. *Lancet Diabetes Endocrinol.* 2018;6:605-17.
17. Ludvik B, Frías JP, Tinahones FJ, Wainstein J, Jiang H, et al. Dulaglutide as add-on therapy to SGLT2 inhibitors in patients with inadequately controlled type 2 diabetes (AWARD-10): a 24-week, randomised, double-blind, placebo-controlled trial. *Lancet Diabetes Endocrinol.* 2018;6:370-81.
18. Chen YH, Huang CN, Cho YM, Li P, Gu L, et al. Efficacy and safety of dulaglutide monotherapy compared with glimepiride in East-Asian patients with type 2 diabetes in a multicentre, double-blind, randomized, parallel-arm, active comparator, phase III trial. *Diabetes Obes Metab.* 2018;20:2121-30.
19. Gerstein HC, Colhoun HM, Dagenais GR, Diaz R, Lakshmanan M, et al. Dulaglutide and cardiovascular outcomes in type 2 diabetes (REWIND): a double-blind, randomised placebo-controlled trial. *Lancet.* 2019;394:121-30.
20. Heine RJ, Van Gaal LF, Johns D, Mihm MJ, Widel MH, et al. Exenatide versus insulin glargine in patients with suboptimally controlled type 2 diabetes: a randomized trial. *Ann Intern Med.* 2005;143:559-69.
21. Nauck MA, Duran S, Kim D, Johns D, Northrup J, et al. A comparison of twice-daily exenatide and biphasic insulin aspart in patients with type 2 diabetes who were suboptimally controlled with sulfonylurea and metformin: a non-inferiority study. *Diabetologia.* 2007;50:259-67.
22. AstraZeneca, Lilly E, Company. Effect of Exenatide on Abdominal Fat Distribution in Patients With Type 2 Diabetes Pretreated With Metformin. In.: <https://ClinicalTrials.gov/show/NCT00701935>; 2008.
23. Gallwitz B, Guzman J, Dotta F, Guerci B, Simó R, et al. Exenatide twice daily

- versus glimepiride for prevention of glycaemic deterioration in patients with type 2 diabetes with metformin failure (EUREXA): an open-label, randomised controlled trial. *Lancet*. 2012;379:2270-8.
24. Diamant M, Van Gaal L, Stranks S, Northrup J, Cao D, et al. Once weekly exenatide compared with insulin glargine titrated to target in patients with type 2 diabetes (DURATION-3): an open-label randomised trial. *Lancet*. 2010;375:2234-43.
  25. Inagaki N, Atsumi Y, Oura T, Saito H, Imaoka T. Efficacy and safety profile of exenatide once weekly compared with insulin once daily in Japanese patients with type 2 diabetes treated with oral antidiabetes drug(s): results from a 26-week, randomized, open-label, parallel-group, multicenter, noninferiority study. *Clin Ther*. 2012;34:1892-908.e1.
  26. Davies M, Heller S, Sreenan S, Sapin H, Adetunji O, et al. Once-weekly exenatide versus once- or twice-daily insulin detemir: randomized, open-label, clinical trial of efficacy and safety in patients with type 2 diabetes treated with metformin alone or in combination with sulfonylureas. *Diabetes Care*. 2013;36:1368-76.
  27. Nauck M, Frid A, Hermansen K, Shah NS, Tankova T, et al. Efficacy and safety comparison of liraglutide, glimepiride, and placebo, all in combination with metformin, in type 2 diabetes. *Diabetes Care*. 2009;32:84-90.
  28. Garber A, Henry R, Ratner R, Garcia-Hernandez PA, Rodriguez-Pattzi H, et al. Liraglutide versus glimepiride monotherapy for type 2 diabetes (LEAD-3 Mono): a randomised, 52-week, phase III, double-blind, parallel-treatment trial. *Lancet*. 2009;373:473-81.
  29. Pratley RE, Nauck M, Bailey T, Montanya E, Cuddihy R, et al. Liraglutide versus sitagliptin for patients with type 2 diabetes who did not have adequate glycaemic control with metformin: a 26-week, randomised, parallel-group, open-label trial. *Lancet*. 2010;375:1447-56.
  30. Charbonnel B, Steinberg H, Eymard E, Xu L, Thakkar P, et al. Efficacy and safety over 26 weeks of an oral treatment strategy including sitagliptin compared with an injectable treatment strategy with liraglutide in patients with type 2 diabetes

- mellitus inadequately controlled on metformin: a randomised clinical trial. *Diabetologia*. 2013;56:1503-11.
31. Lind M, Hirsch IB, Tuomilehto J, Dahlqvist S, Ahrén B, et al. Liraglutide in people treated for type 2 diabetes with multiple daily insulin injections: Randomised clinical trial (MDI Liraglutide trial). *BMJ*. 2015;351.
  32. Pi-Sunyer X, Astrup A, Fujioka K, Greenway F, Halpern A, et al. A randomized, controlled trial of 3.0 mg of liraglutide in weight management. *New England Journal of Medicine*. 2015;373:11-22.
  33. Vanderheiden A, Harrison L, Warshauer J, Li X, Adams-Huet B, et al. Effect of Adding Liraglutide vs Placebo to a High-Dose Insulin Regimen in Patients With Type 2 Diabetes: A Randomized Clinical Trial. *JAMA Intern Med*. 2016;176:939-47.
  34. Marso SP, Daniels GH, Brown-Frandsen K, Kristensen P, Mann JF, et al. Liraglutide and Cardiovascular Outcomes in Type 2 Diabetes. *N Engl J Med*. 2016;375:311-22.
  35. Zang L, Liu Y, Geng J, Luo Y, Bian F, et al. Efficacy and safety of liraglutide versus sitagliptin, both in combination with metformin, in Chinese patients with type 2 diabetes: a 26-week, open-label, randomized, active comparator clinical trial. *Diabetes Obes Metab*. 2016;18:803-11.
  36. Garvey WT, Birkenfeld AL, Dicker D, Mingrone G, Pedersen SD, et al. Efficacy and Safety of Liraglutide 3.0 mg in Individuals With Overweight or Obesity and Type 2 Diabetes Treated With Basal Insulin: The SCALE Insulin Randomized Controlled Trial. *Diabetes Care*. 2020;43:1085-93.
  37. Ahrén B, Leguizamo Dimas A, Miossec P, Saubadu S, Aronson R. Efficacy and safety of lixisenatide once-daily morning or evening injections in type 2 diabetes inadequately controlled on metformin (GetGoal-M). *Diabetes Care*. 2013;36:2543-50.
  38. Riddle MC, Aronson R, Home P, Marre M, Niemoeller E, et al. Adding once-daily lixisenatide for type 2 diabetes inadequately controlled by established basal insulin: a 24-week, randomized, placebo-controlled comparison (GetGoal-L). *Diabetes*

Care. 2013;36:2489-96.

39. Bolli GB, Munteanu M, Dotsenko S, Niemoeller E, Boka G, et al. Efficacy and safety of lixisenatide once daily vs. placebo in people with Type 2 diabetes insufficiently controlled on metformin (GetGoal-F1). *Diabet Med.* 2014;31:176-84.
40. Pfeffer MA, Claggett B, Diaz R, Dickstein K, Gerstein HC, et al. Lixisenatide in patients with type 2 diabetes and acute coronary syndrome. *N Engl J Med.* 2015;373:2247-57.
41. Rosenstock J, Guerci B, Hanefeld M, Gentile S, Aronson R, et al. Prandial Options to Advance Basal Insulin Glargine Therapy: Testing Lixisenatide Plus Basal Insulin Versus Insulin Glulisine Either as Basal-Plus or Basal-Bolus in Type 2 Diabetes: The GetGoal Duo-2 Trial. *Diabetes Care.* 2016;39:1318-28.
42. Rodbard HW, Rosenstock J, Canani LH, Deerochanawong C, Gumprecht J, et al. Oral semaglutide versus empagliflozin in patients with type 2 diabetes uncontrolled on metformin: The PIONEER 2 trial. *Diabetes Care.* 2019;42:2272-81.
43. Rosenstock J, Allison D, Birkenfeld AL, Blicher TM, Deenadayalan S, et al. Effect of Additional Oral Semaglutide vs Sitagliptin on Glycated Hemoglobin in Adults With Type 2 Diabetes Uncontrolled With Metformin Alone or With Sulfonylurea: The PIONEER 3 Randomized Clinical Trial. *JAMA.* 2019;321:1466-80.
44. Mosenzon O, Blicher TM, Rosenlund S, Eriksson JW, Heller S, et al. Efficacy and safety of oral semaglutide in patients with type 2 diabetes and moderate renal impairment (PIONEER 5): a placebo-controlled, randomised, phase 3a trial. *Lancet Diabetes Endocrinol.* 2019;7:515-27.
45. Husain M, Birkenfeld AL, Donsmark M, Dungan K, Eliaschewitz FG, et al. Oral Semaglutide and Cardiovascular Outcomes in Patients with Type 2 Diabetes. *N Engl J Med.* 2019;381:841-51.
46. Zinman B, Aroda VR, Buse JB, Cariou B, Harris SB, et al. Efficacy, Safety, and Tolerability of Oral Semaglutide Versus Placebo Added to Insulin With or Without Metformin in Patients With Type 2 Diabetes: The PIONEER 8 Trial

- NCT03021187. *Diabetes Care*. 2019;42:2262-71.
47. Marso SP, Bain SC, Consoli A, Eliaschewitz FG, Jódar E, et al. Semaglutide and Cardiovascular Outcomes in Patients with Type 2 Diabetes. *N Engl J Med*. 2016;375:1834-44.
  48. Ahrén B, Masmiquel L, Kumar H, Sargin M, Karsbøl JD, et al. Efficacy and safety of once-weekly semaglutide versus once-daily sitagliptin as an add-on to metformin, thiazolidinediones, or both, in patients with type 2 diabetes (SUSTAIN 2): a 56-week, double-blind, phase 3a, randomised trial. *Lancet Diabetes Endocrinol*. 2017;5:341-54.
  49. Aroda VR, Bain SC, Cariou B, Piletič M, Rose L, et al. Efficacy and safety of once-weekly semaglutide versus once-daily insulin glargine as add-on to metformin (with or without sulfonylureas) in insulin-naïve patients with type 2 diabetes (SUSTAIN 4): a randomised, open-label, parallel-group, multicentre, multinational, phase 3a trial. *Lancet Diabetes Endocrinol*. 2017;5:355-66.
  50. Kaku K, Yamada Y, Watada H, Abiko A, Nishida T, et al. Safety and efficacy of once-weekly semaglutide vs additional oral antidiabetic drugs in Japanese people with inadequately controlled type 2 diabetes: A randomized trial. *Diabetes Obes Metab*. 2018;20:1202-12.
  51. Ji L, Dong X, Li Y, Li Y, Lim S, et al. Efficacy and safety of once-weekly semaglutide versus once-daily sitagliptin as add-on to metformin in patients with type 2 diabetes in SUSTAIN China: A 30-week, double-blind, phase 3a, randomized trial. *Diabetes Obes Metab*. 2021;23:404-14.
  52. Wilding JPH, Batterham RL, Calanna S, Davies M, Van Gaal LF, et al. Once-Weekly Semaglutide in Adults with Overweight or Obesity. *N Engl J Med*. 2021;384:989-1002.
  53. Davies M, Færch L, Jeppesen OK, Pakseresht A, Pedersen SD, et al. Semaglutide 2·4 mg once a week in adults with overweight or obesity, and type 2 diabetes (STEP 2): a randomised, double-blind, double-dummy, placebo-controlled, phase 3 trial. *Lancet*. 2021;397:971-84.
  54. Rubino D, Abrahamsson N, Davies M, Hesse D, Greenway FL, et al. Effect of

Continued Weekly Subcutaneous Semaglutide vs Placebo on Weight Loss Maintenance in Adults With Overweight or Obesity: The STEP 4 Randomized Clinical Trial. *JAMA*. 2021;325:1414-25.

55. Kadowaki T, Isendahl J, Khalid U, Lee SY, Nishida T, et al. Semaglutide once a week in adults with overweight or obesity, with or without type 2 diabetes in an east Asian population (STEP 6): a randomised, double-blind, double-dummy, placebo-controlled, phase 3a trial. *Lancet Diabetes Endocrinol*. 2022;10:193-206.
56. Kellerer M, Kaltoft MS, Lawson J, Nielsen LL, Strojek K, et al. Effect of once-weekly semaglutide versus thrice-daily insulin aspart, both as add-on to metformin and optimized insulin glargine treatment in participants with type 2 diabetes (SUSTAIN 11): a randomized, open-label, multinational, phase 3b trial. *Diabetes Obes Metab*. 2022.
